# Supplementary material
Source: PubMed Central journal article supplement (PMC8250278)
Supplement: PMIC-21-0-s001.pdf [file PMIC-21-0-s001.pdf]

RACK LAYOUT FOR SYNTHESIS :

**31751 : Rack A**

DESCRIPTION : 564 peptides based on sequences provided.

COMMENTS: Peptides despatched dried down.  
All controls have been removed for QC testing.

| A1 | A2 | A3 | A4 | A5 | A6 | A7 | A8 | A9 | A10 | A11 | A12 |
|----|----|----|----|----|----|----|----|----|-----|-----|-----|
| 1  | 9  | 17 | 25 | 33 | 41 | 49 | 57 | 65 | 73  | 81  | 89  |
| B1 | B2 | B3 | B4 | B5 | B6 | B7 | B8 | B9 | B10 | B11 | B12 |
| 2  | 10 | 18 | 26 | 34 | 42 | 50 | 58 | 66 | 74  | 82  | 90  |
| C1 | C2 | C3 | C4 | C5 | C6 | C7 | C8 | C9 | C10 | C11 | C12 |
| 3  | 11 | 19 | 27 | 35 | 43 | 51 | 59 | 67 | 75  | 83  | 91  |
| D1 | D2 | D3 | D4 | D5 | D6 | D7 | D8 | D9 | D10 | D11 | D12 |
| 4  | 12 | 20 | 28 | 36 | 44 | 52 | 60 | 68 | 76  | 84  | 92  |
| E1 | E2 | E3 | E4 | E5 | E6 | E7 | E8 | E9 | E10 | E11 | E12 |
| 5  | 13 | 21 | 29 | 37 | 45 | 53 | 61 | 69 | 77  | 85  | 93  |
| F1 | F2 | F3 | F4 | F5 | F6 | F7 | F8 | F9 | F10 | F11 | F12 |
| 6  | 14 | 22 | 30 | 38 | 46 | 54 | 62 | 70 | 78  | 86  | 94  |
| G1 | G2 | G3 | G4 | G5 | G6 | G7 | G8 | G9 | G10 | G11 | G12 |
| 7  | 15 | 23 | 31 | 39 | 47 | 55 | 63 | 71 | 79  | 87  |     |
| H1 | H2 | H3 | H4 | H5 | H6 | H7 | H8 | H9 | H10 | H11 | H12 |
| 8  | 16 | 24 | 32 | 40 | 48 | 56 | 64 | 72 | 80  | 88  |     |

- |                |                    |                |                    |                |                             |
|----------------|--------------------|----------------|--------------------|----------------|-----------------------------|
| 1 : orflpp-1   | : MESLVPGFNEKTHVQ  | 33 : orflpp-33 | : WNTKHSSGVTRELMR  | 65 : orflpp-65 | : MKCDHCGETSWQTGD           |
| 2 : orflpp-2   | : PGFNEKTHVQLSLPV  | 34 : orflpp-34 | : SSGVTRELMRELNGG  | 66 : orflpp-66 | : CGETSWQTGDFVKAT           |
| 3 : orflpp-3   | : KTHVQLSLPVLQVRD  | 35 : orflpp-35 | : RELMRELNGGAYTRY  | 67 : orflpp-67 | : WQTGDFVKATCFEFCG          |
| 4 : orflpp-4   | : LSLPVLQVRDVLVRG  | 36 : orflpp-36 | : ELNGGAYTRYVDNMF  | 68 : orflpp-68 | : FVKATCFEFCGTENLT          |
| 5 : orflpp-5   | : LQVRDVLVRGFGDSV  | 37 : orflpp-37 | : AYTRYVDNNFCGPDG  | 69 : orflpp-69 | : CFCGTENLTKEGAT            |
| 6 : orflpp-6   | : VLVRGFGDSVEEVLS  | 38 : orflpp-38 | : VDNNFCGPDGYPLEC  | 70 : orflpp-70 | : TENLTKEGATTCGYL           |
| 7 : orflpp-7   | : FGDSEVEVLSEARQH  | 39 : orflpp-39 | : CGPDGYPLECIKDLL  | 71 : orflpp-71 | : KEGATTCGYLPQNAV           |
| 8 : orflpp-8   | : EEVLSEARQHLKDG   | 40 : orflpp-40 | : YPLECIKDLLARAGK  | 72 : orflpp-72 | : TCGYLPQNAVVKIYC           |
| 9 : orflpp-9   | : EARQHLLKDGTCGLVE | 41 : orflpp-41 | : IKDLLARAGKASCTL  | 73 : orflpp-73 | : PQNAVVKIYCPACHN           |
| 10 : orflpp-10 | : LKDGTCGLVEVEKGV  | 42 : orflpp-42 | : ARAGKASCTLSEQLD  | 74 : orflpp-74 | : VKIYCPACHNSEVGP           |
| 11 : orflpp-11 | : CGLVEVEKGVLPQLE  | 43 : orflpp-43 | : ASCTLSEQLDFIDTK  | 75 : orflpp-75 | : PACHNSEVGPPEHSLA          |
| 12 : orflpp-12 | : VEKGVLPQLEQPYVF  | 44 : orflpp-44 | : SEQLDFIDTKRGVYC  | 76 : orflpp-76 | : SEVGPPEHSLAEYHNE          |
| 13 : orflpp-13 | : LPQLEQPYVFIKRSD  | 45 : orflpp-45 | : FIDTKRGVYCCREHE  | 77 : orflpp-77 | : EHS LAEYHNESGLKT          |
| 14 : orflpp-14 | : QPYVFIKRSDARTAP  | 46 : orflpp-46 | : RGVYCCREHEHEIAW  | 78 : orflpp-78 | : EYHNESGLKTI LRKG          |
| 15 : orflpp-15 | : IKRSDARTAPHGVM   | 47 : orflpp-47 | : CREHEHEIAWYTERS  | 79 : orflpp-79 | : SGLKTI LRKGGRTIA          |
| 16 : orflpp-16 | : ARTAPHGVMVELVA   | 48 : orflpp-48 | : HEIAWYTERSEKSYE  | 80 : orflpp-80 | : I LRKGGRTIAFGCV           |
| 17 : orflpp-17 | : HGHVMVELVAELEGI  | 49 : orflpp-49 | : YTERSEKSYELQTPF  | 81 : orflpp-81 | : GRTIAFGCVFSYVG            |
| 18 : orflpp-18 | : VELVAELEGIQYGRS  | 50 : orflpp-50 | : EKSYLELQTPFEIKLA | 82 : orflpp-82 | : FGGCVFSYVGCHNKC           |
| 19 : orflpp-19 | : ELEGIQYGRSGETLG  | 51 : orflpp-51 | : LQTPFEIKLAKKFD   | 83 : orflpp-83 | : FSYVGCHNKCAYWVP           |
| 20 : orflpp-20 | : QYGRSGETLGVLPV   | 52 : orflpp-52 | : EIKLAKKFDTFNGEC  | 84 : orflpp-84 | : CHNKCAYWVPRASAN           |
| 21 : orflpp-21 | : GETLGVLPVHVEIIP  | 53 : orflpp-53 | : KKFDTFNGECPNFVF  | 85 : orflpp-85 | : AYWVPRASANIGCNH           |
| 22 : orflpp-22 | : VLVPHVGEIPVAYRK  | 54 : orflpp-54 | : FNGECPNFVPLNSI   | 86 : orflpp-86 | : RASANIGCNHTGVV            |
| 23 : orflpp-23 | : VGEIPVAYRKVLLRK  | 55 : orflpp-55 | : PLNFVPLNSIIKTIQ  | 87 : orflpp-87 | : IGCNHTGVVGESE             |
| 24 : orflpp-24 | : VAYRKVLLRKNNGK   | 56 : orflpp-56 | : PLSNIIKTIQPRVEK  | 88 : orflpp-88 | : TGVVGESEGLNDNL            |
| 25 : orflpp-25 | : VLLRKNNGKAGGHS   | 57 : orflpp-57 | : IKTIQPRVEKKLGD   | 89 : orflpp-89 | : EGSEGLNDNLLEILQ           |
| 26 : orflpp-26 | : NGNKGAGGHSYGADL  | 58 : orflpp-58 | : PRVEKKLGDGFMGRI  | 90 : orflpp-90 | : LNDNLLEILQKEKVN           |
| 27 : orflpp-27 | : AGGHSYGADLKSFDL  | 59 : orflpp-59 | : KKLGDGFMGRIRSVYP | 91 : orflpp-91 | : LEILQKEKVNINIVG           |
| 28 : orflpp-28 | : YGADLKSFDLGDELG  | 60 : orflpp-60 | : FMGRIRSVYPVASEPN | 92 : orflpp-92 | : KEKVNINIVGDFKLN           |
| 29 : orflpp-29 | : KSFDLGDELGTDPYE  | 61 : orflpp-61 | : RSVYPVASEPNECNQ  | 93 : orflpp-93 | : INIVGDFKLN E E I A I      |
| 30 : orflpp-30 | : GDELGTDPYEDFQEN  | 62 : orflpp-62 | : VASEPNECNQMCLSTL | 94 : orflpp-94 | : DFKLN E E I A I I L A S F |
| 31 : orflpp-31 | : TDPYEDFQENWNTKH  | 63 : orflpp-63 | : ECNQMCLSTLMKCDH  |                |                             |
| 32 : orflpp-32 | : DFQENWNTKHSSGVT  | 64 : orflpp-64 | : CLSTLMKCDHCGETS  |                |                             |

RACK LAYOUT FOR SYNTHESIS :

**31751 : Rack B**

DESCRIPTION : 564 peptides based on sequences provided.

COMMENTS: Peptides despatched dried down.  
All controls have been removed for QC testing.

| A1  | A2  | A3  | A4  | A5  | A6  | A7  | A8  | A9  | A10 | A11 | A12 |
|-----|-----|-----|-----|-----|-----|-----|-----|-----|-----|-----|-----|
| 95  | 103 | 111 | 119 | 127 | 135 | 143 | 151 | 159 | 167 | 175 | 183 |
| B1  | B2  | B3  | B4  | B5  | B6  | B7  | B8  | B9  | B10 | B11 | B12 |
| 96  | 104 | 112 | 120 | 128 | 136 | 144 | 152 | 160 | 168 | 176 | 184 |
| C1  | C2  | C3  | C4  | C5  | C6  | C7  | C8  | C9  | C10 | C11 | C12 |
| 97  | 105 | 113 | 121 | 129 | 137 | 145 | 153 | 161 | 169 | 177 | 185 |
| D1  | D2  | D3  | D4  | D5  | D6  | D7  | D8  | D9  | D10 | D11 | D12 |
| 98  | 106 | 114 | 122 | 130 | 138 | 146 | 154 | 162 | 170 | 178 | 186 |
| E1  | E2  | E3  | E4  | E5  | E6  | E7  | E8  | E9  | E10 | E11 | E12 |
| 99  | 107 | 115 | 123 | 131 | 139 | 147 | 155 | 163 | 171 | 179 | 187 |
| F1  | F2  | F3  | F4  | F5  | F6  | F7  | F8  | F9  | F10 | F11 | F12 |
| 100 | 108 | 116 | 124 | 132 | 140 | 148 | 156 | 164 | 172 | 180 | 188 |
| G1  | G2  | G3  | G4  | G5  | G6  | G7  | G8  | G9  | G10 | G11 | G12 |
| 101 | 109 | 117 | 125 | 133 | 141 | 149 | 157 | 165 | 173 | 181 |     |
| H1  | H2  | H3  | H4  | H5  | H6  | H7  | H8  | H9  | H10 | H11 | H12 |
| 102 | 110 | 118 | 126 | 134 | 142 | 150 | 158 | 166 | 174 | 182 |     |

95 : orflpp-95 : EEIAILASFSASTS 127 : orflpp-127 : LEEKFKEGVEFLRDG 159 : orflpp-159 : LEIKDTEKYCALAPN  
 96 : orflpp-96 : ILASFSASTSAFVET 128 : orflpp-128 : KEGVEFLRDGWEIVK 160 : orflpp-160 : TEKYCALAPNMMVNTN  
 97 : orflpp-97 : SASTSAFVETVKGLD 129 : orflpp-129 : FLRDGWEIVKFISTC 161 : orflpp-161 : ALAPNMMVNTNFTL  
 98 : orflpp-98 : AFVETVKGLDYKAFK 130 : orflpp-130 : WEIVKFISTCACEIV 162 : orflpp-162 : MMVNTNFTLKGKAP  
 99 : orflpp-99 : VKGLDYKAFKQIVES 131 : orflpp-131 : FISTCACEIVGGQIV 163 : orflpp-163 : NFTLKGKAPTKVTF  
 100 : orflpp-100 : YKAFKQIVESCNGFK 132 : orflpp-132 : ACEIVGGQIVTCAKE 164 : orflpp-164 : KGGAPTQVTFGDDTV  
 101 : orflpp-101 : QIVESCNGFKVTKGK 133 : orflpp-133 : GGQIVTCAKEIKESV 165 : orflpp-165 : TKVTFGDDTVIEVQG  
 102 : orflpp-102 : CGNFKVTKGKAKKGA 134 : orflpp-134 : TCAKEIKESVQTFK 166 : orflpp-166 : GDDTVIEVQGYKSVN  
 103 : orflpp-103 : VTGKAKKGAWNIGE 135 : orflpp-135 : IKESVQTFKLVNKF 167 : orflpp-167 : IEVQGYKSVNITFEL  
 104 : orflpp-104 : AKKGAWNIGEQKSIL 136 : orflpp-136 : QTFKLVNKFALCA 168 : orflpp-168 : YKSVNITFELDERID  
 105 : orflpp-105 : WNIGEQKSILSPLYA 137 : orflpp-137 : LVNKFALCADIIS 169 : orflpp-169 : ITFELDERIDKVLNE  
 106 : orflpp-106 : QKSILSPLYAFASEA 138 : orflpp-138 : LALCADIISIGAKL 170 : orflpp-170 : DERIDKVLNEKCSAY  
 107 : orflpp-107 : SPLYAFASEAARVVR 139 : orflpp-139 : DSIIIGAKLKALNL 171 : orflpp-171 : KVLNEKCSAYTVELG  
 108 : orflpp-108 : FASEAARVRSIFSR 140 : orflpp-140 : GGAKLKALNLGETFV 172 : orflpp-172 : KCSAYTVELGTEVNE  
 109 : orflpp-109 : ARVRSIFSRILETA 141 : orflpp-141 : KALNLGETFVTHSKG 173 : orflpp-173 : TVELGTEVNEFACVV  
 110 : orflpp-110 : SIFSRILETAQNSVR 142 : orflpp-142 : GETFVTHSKGLYRKC 174 : orflpp-174 : TEVNEFACVVADAVI  
 111 : orflpp-111 : TLETAQNSVRVLQKA 143 : orflpp-143 : THSKGLYRKCVSRE 175 : orflpp-175 : FACVVADAVIKTLQP  
 112 : orflpp-112 : QNSVRVLQKAAITIL 144 : orflpp-144 : LYRKCVSREETGLL 176 : orflpp-176 : ADAVIKTLQPVSELL  
 113 : orflpp-113 : VLQKAAITILDGISQ 145 : orflpp-145 : VKSREETGLLMLPKA 177 : orflpp-177 : KTLQPVSELLTPLGI  
 114 : orflpp-114 : AITILDGISQYSLRL 146 : orflpp-146 : ETGLLMLPKAPKEII 178 : orflpp-178 : VSELLTPLGIDLDEW  
 115 : orflpp-115 : DGISQYSLRLIDAMM 147 : orflpp-147 : MPLKAPKEIIFLEGE 179 : orflpp-179 : TPLGIDLDEWSMATY  
 116 : orflpp-116 : YSLRLIDAMMFTSDL 148 : orflpp-148 : PKEIIFLEGETLPT 180 : orflpp-180 : DLDEWSMATYFLFDE  
 117 : orflpp-117 : IDAMMFTSDLATNVL 149 : orflpp-149 : FLEGETLPTTEVLT 181 : orflpp-181 : SMATYFLFDESGEFK  
 118 : orflpp-118 : FTSDLATNVLVMAY 150 : orflpp-150 : TLPTTEVLTTEVVLK 182 : orflpp-182 : YLFDESGEFKLASHM  
 119 : orflpp-119 : ATNVLVMAYITGGV 151 : orflpp-151 : VLTEEVVLKTDGLQP 183 : orflpp-183 : SGFELASHMYCSFY  
 120 : orflpp-120 : VVMAYITGGVVQLTS 152 : orflpp-152 : VVLKTDGLQPLEQPT 184 : orflpp-184 : LASHMYCSFYPPDED  
 121 : orflpp-121 : ITGGVVQLTSQWLTN 153 : orflpp-153 : GDLQPLEQPTSEAVE 185 : orflpp-185 : YCSFYPPDEDEEEGD  
 122 : orflpp-122 : VQLTSQWLTNIFGTV 154 : orflpp-154 : LEQPTSEAVEAPLVG 186 : orflpp-186 : PPDEDEEEGDCEEEE  
 123 : orflpp-123 : QWLTNIFGTVYEKLL 155 : orflpp-155 : SEAVEAPLVGTPVCI 187 : orflpp-187 : EEEGDCEEEEFEPST  
 124 : orflpp-124 : IFGTVYEKLLPVLWD 156 : orflpp-156 : APLVGT PVCINGLML 188 : orflpp-188 : CEEEFEPSTQYIEYG  
 125 : orflpp-125 : YEKLLPVLWDLEEK 157 : orflpp-157 : TPVCINGLMLLEIKD  
 126 : orflpp-126 : PVLWDLEEKFKEGVE 158 : orflpp-158 : NGLMLLEIKDTEKYC

RACK LAYOUT FOR SYNTHESIS :

**31751 : Rack C**

DESCRIPTION : 564 peptides based on sequences provided.

COMMENTS: Peptides despatched dried down.  
All controls have been removed for QC testing.

| A1  | A2  | A3  | A4  | A5  | A6  | A7  | A8  | A9  | A10 | A11 | A12 |
|-----|-----|-----|-----|-----|-----|-----|-----|-----|-----|-----|-----|
| 189 | 197 | 205 | 213 | 221 | 229 | 237 | 245 | 253 | 261 | 269 | 277 |
| B1  | B2  | B3  | B4  | B5  | B6  | B7  | B8  | B9  | B10 | B11 | B12 |
| 190 | 198 | 206 | 214 | 222 | 230 | 238 | 246 | 254 | 262 | 270 | 278 |
| C1  | C2  | C3  | C4  | C5  | C6  | C7  | C8  | C9  | C10 | C11 | C12 |
| 191 | 199 | 207 | 215 | 223 | 231 | 239 | 247 | 255 | 263 | 271 | 279 |
| D1  | D2  | D3  | D4  | D5  | D6  | D7  | D8  | D9  | D10 | D11 | D12 |
| 192 | 200 | 208 | 216 | 224 | 232 | 240 | 248 | 256 | 264 | 272 | 280 |
| E1  | E2  | E3  | E4  | E5  | E6  | E7  | E8  | E9  | E10 | E11 | E12 |
| 193 | 201 | 209 | 217 | 225 | 233 | 241 | 249 | 257 | 265 | 273 | 281 |
| F1  | F2  | F3  | F4  | F5  | F6  | F7  | F8  | F9  | F10 | F11 | F12 |
| 194 | 202 | 210 | 218 | 226 | 234 | 242 | 250 | 258 | 266 | 274 | 282 |
| G1  | G2  | G3  | G4  | G5  | G6  | G7  | G8  | G9  | G10 | G11 | G12 |
| 195 | 203 | 211 | 219 | 227 | 235 | 243 | 251 | 259 | 267 | 275 |     |
| H1  | H2  | H3  | H4  | H5  | H6  | H7  | H8  | H9  | H10 | H11 | H12 |
| 196 | 204 | 212 | 220 | 228 | 236 | 244 | 252 | 260 | 268 | 276 |     |

189 : orflpp-189 : FEPSTQYEGTEDDY 221 : orflpp-221 : GSCVLSGHNLAHKHCL 253 : orflpp-253 : GNLHPDSATLVSDDID  
 190 : orflpp-190 : QYEGTEDDYQGKPL 222 : orflpp-222 : SGHNLAHKHCLHVVG 254 : orflpp-254 : DSATLVSDDIDITFLK  
 191 : orflpp-191 : TEDDYQGKPLEFGAT 223 : orflpp-223 : AKHCLHVVGPNVNGK 255 : orflpp-255 : VSDIDITFLKKDAPY  
 192 : orflpp-192 : QGKPLEFGATSAAQ 224 : orflpp-224 : HVVGPNVNGGEDIQL 256 : orflpp-256 : ITFLKKDAPYIVGDV  
 193 : orflpp-193 : EFGATSAAQPEEEQ 225 : orflpp-225 : NVNKGEDIQLKSAY 257 : orflpp-257 : KDAPYIVGDVVQEGV  
 194 : orflpp-194 : SAALQPEEEQEEDWL 226 : orflpp-226 : EDIQLLKSAYENFNQ 258 : orflpp-258 : IVGDVVQEGVLTAVV  
 195 : orflpp-195 : PEEQEEDWLDDDSQ 227 : orflpp-227 : LKSAYENFNQHEVLL 259 : orflpp-259 : VQEGVLTAVVIPTKK  
 196 : orflpp-196 : EEDWLDDDSQTVGQ 228 : orflpp-228 : ENFNQHEVLLAPLLS 260 : orflpp-260 : LTAVVIPTKKAGGTT  
 197 : orflpp-197 : DDDSQTVGQDQDSE 229 : orflpp-229 : HEVLLAPLLSAGIFG 261 : orflpp-261 : IPTKKAGGTTMLAK  
 198 : orflpp-198 : QTVGQDQDSEDNQTT 230 : orflpp-230 : APLLSAGIFGADPIH 262 : orflpp-262 : AGGTTMLAKALRKY  
 199 : orflpp-199 : QDGEDNQTTTIQTI 231 : orflpp-231 : AGIFGADPIHSLRVC 263 : orflpp-263 : EMLAKALRKYPTDNY  
 200 : orflpp-200 : DNQTTTIQTIIVEVQP 232 : orflpp-232 : ADPIHSLRVCVDTVR 264 : orflpp-264 : ALRKYPTDNYITTY  
 201 : orflpp-201 : TIQTIIVEVQPQLEME 233 : orflpp-233 : SLRVCVDTVRTNVYL 265 : orflpp-265 : PTDNYITTYPGQGLN  
 202 : orflpp-202 : VEVQPQLEMEVTPV 234 : orflpp-234 : VDTVRTNVYLAVDFK 266 : orflpp-266 : ITTYPGQGLNGYTV  
 203 : orflpp-203 : QLEMEVTPVQTIIEV 235 : orflpp-235 : TNVYLAVDFKNLYDK 267 : orflpp-267 : GQGLNGYTVVEAKTV  
 204 : orflpp-204 : LTPVVQTIIEVNSFSG 236 : orflpp-236 : AVDFKNLYDKLVSSF 268 : orflpp-268 : GYTVVEAKTVLKKCK  
 205 : orflpp-205 : QTIEVNSFSGYLKLT 237 : orflpp-237 : NLYDKLVSSFLEMKS 269 : orflpp-269 : EAKTVLKKCKSAFYI  
 206 : orflpp-206 : NSFSGYLKLTNDVYI 238 : orflpp-238 : LVSSFLEMKSEKQVE 270 : orflpp-270 : LKKCKSAFYILPSII  
 207 : orflpp-207 : YLKLTDNVYIKNADI 239 : orflpp-239 : LEMKSEKQVEQKIAE 271 : orflpp-271 : SAFYILPSIISNEKQ  
 208 : orflpp-208 : DNVYIKNADIVEEAK 240 : orflpp-240 : EKQVEQKIAEIPKEE 272 : orflpp-272 : LPSIISNEKQEIILGT  
 209 : orflpp-209 : KNADIVEEAKVKVPT 241 : orflpp-241 : QKIAEIPKEEVKPF 273 : orflpp-273 : SNEKQEIILGTVSWNL  
 210 : orflpp-210 : VEEAKVKVPTVVVNA 242 : orflpp-242 : IPKEEVKPFITESKP 274 : orflpp-274 : EIILGTVSWNLREMLA  
 211 : orflpp-211 : KVKPTVVVNAANVYL 243 : orflpp-243 : VKPFITESKPSVEQR 275 : orflpp-275 : VSWNLREMLAHAET  
 212 : orflpp-212 : VVVNAANVYLKHGGG 244 : orflpp-244 : TESKPSVEQRKQDDK 276 : orflpp-276 : REMLAHAETRKLMP  
 213 : orflpp-213 : ANVYLKHGGGVAGAL 245 : orflpp-245 : SVEQRKQDDKKIKAC 277 : orflpp-277 : HAETRKLMPVCVET  
 214 : orflpp-214 : KHGGGVAGALNKATN 246 : orflpp-246 : KQDDKKIKACVEEVT 278 : orflpp-278 : RKLMPVCVETKAIVS  
 215 : orflpp-215 : VAGALNKATNNAMQV 247 : orflpp-247 : KIKACVEEVTTTLEE 279 : orflpp-279 : VCVETKAIVSTIQRK  
 216 : orflpp-216 : NKATNNAMQVESDDY 248 : orflpp-248 : VEEVTTTLEETKFLT 280 : orflpp-280 : KAIVSTIQRKYKGIK  
 217 : orflpp-217 : NAMQVESDDYIATNG 249 : orflpp-249 : TTLEETKFLTENLLL 281 : orflpp-281 : TIQRKYKGIKIQEGV  
 218 : orflpp-218 : ESDDYIATNGPLKVG 250 : orflpp-250 : TKFLTENLLLYIDIN 282 : orflpp-282 : YKGIKIQEGVVDYGA  
 219 : orflpp-219 : IATNGPLKVGSGCVL 251 : orflpp-251 : ENLLYIDINGNLHP  
 220 : orflpp-220 : PLKVGSGCVLSGHN 252 : orflpp-252 : YIDINGNLHPDSATL

RACK LAYOUT FOR SYNTHESIS :

**31751 : Rack D**

DESCRIPTION : 564 peptides based on sequences provided.

COMMENTS: Peptides despatched dried down.  
All controls have been removed for QC testing.

| A1  | A2  | A3  | A4  | A5  | A6  | A7  | A8  | A9  | A10 | A11 | A12 |
|-----|-----|-----|-----|-----|-----|-----|-----|-----|-----|-----|-----|
| 283 | 291 | 299 | 307 | 315 | 323 | 331 | 339 | 347 | 355 | 363 | 371 |
| B1  | B2  | B3  | B4  | B5  | B6  | B7  | B8  | B9  | B10 | B11 | B12 |
| 284 | 292 | 300 | 308 | 316 | 324 | 332 | 340 | 348 | 356 | 364 | 372 |
| C1  | C2  | C3  | C4  | C5  | C6  | C7  | C8  | C9  | C10 | C11 | C12 |
| 285 | 293 | 301 | 309 | 317 | 325 | 333 | 341 | 349 | 357 | 365 | 373 |
| D1  | D2  | D3  | D4  | D5  | D6  | D7  | D8  | D9  | D10 | D11 | D12 |
| 286 | 294 | 302 | 310 | 318 | 326 | 334 | 342 | 350 | 358 | 366 | 374 |
| E1  | E2  | E3  | E4  | E5  | E6  | E7  | E8  | E9  | E10 | E11 | E12 |
| 287 | 295 | 303 | 311 | 319 | 327 | 335 | 343 | 351 | 359 | 367 | 375 |
| F1  | F2  | F3  | F4  | F5  | F6  | F7  | F8  | F9  | F10 | F11 | F12 |
| 288 | 296 | 304 | 312 | 320 | 328 | 336 | 344 | 352 | 360 | 368 | 376 |
| G1  | G2  | G3  | G4  | G5  | G6  | G7  | G8  | G9  | G10 | G11 | G12 |
| 289 | 297 | 305 | 313 | 321 | 329 | 337 | 345 | 353 | 361 | 369 |     |
| H1  | H2  | H3  | H4  | H5  | H6  | H7  | H8  | H9  | H10 | H11 | H12 |
| 290 | 298 | 306 | 314 | 322 | 330 | 338 | 346 | 354 | 362 | 370 |     |

283 : orflpp-283 : IQEGVVDYGARFYFY 315 : orflpp-315 : FTTVDNINLHTQVVD 347 : orflpp-347 : TMSYLFQHANLDSCK  
 284 : orflpp-284 : VDYGARFYFYTSKTT 316 : orflpp-316 : NINLHTQVVDMSMTY 348 : orflpp-348 : FQHANLDSCKRVLNV  
 285 : orflpp-285 : RFYFYTSKTTVASLI 317 : orflpp-317 : TQVVDMSMTYQQQFG 349 : orflpp-349 : LDCKRVLNVVCKTC  
 286 : orflpp-286 : TSKTTVASLINTLND 318 : orflpp-318 : MSMTYQQQFGPTYLD 350 : orflpp-350 : RVLNVVCKTCGQQQT  
 287 : orflpp-287 : VASLINTLNDLNETL 319 : orflpp-319 : GQQFGPTYLDGADV 351 : orflpp-351 : VCKTCGQQQTTLKGV  
 288 : orflpp-288 : NTLNDLNETLVTMPL 320 : orflpp-320 : PTYLDGADVTKIKPH 352 : orflpp-352 : GQQQTTLKGVEAVMY  
 289 : orflpp-289 : LNETLVTMPLGYVTH 321 : orflpp-321 : GADVTKIKPHNSHEG 353 : orflpp-353 : TLKGVEAVMYMGTLS  
 290 : orflpp-290 : VTMPGLYVTHGLNLE 322 : orflpp-322 : NIKPHNSHEGKTFYV 354 : orflpp-354 : EAVMYMGTLSYEQFK  
 291 : orflpp-291 : GYVTHGLNLEEAARY 323 : orflpp-323 : NSHEGKTFYVLPND 355 : orflpp-355 : MGTLSYEQFKKGVQI  
 292 : orflpp-292 : GLNLEEAARYMRSK 324 : orflpp-324 : KTFYVLPNDTLRVE 356 : orflpp-356 : YEQFKKGVQIPCTCG  
 293 : orflpp-293 : EAARYMRSKVPATV 325 : orflpp-325 : LPNDTLRVEAFEY 357 : orflpp-357 : KGVQIPCTCGKQATK  
 294 : orflpp-294 : MRSKVPATVSVSSP 326 : orflpp-326 : TLRVEAFEYHTTDP 358 : orflpp-358 : PCTCGKQATKYLVQQ  
 295 : orflpp-295 : VPATVSVSPDAVTA 327 : orflpp-327 : AFEYHTTDPDFLGR 359 : orflpp-359 : KQATKYLVQQESPFV  
 296 : orflpp-296 : SVSPDAVTAYNGYL 328 : orflpp-328 : HTTDPDFLGRYSAL 360 : orflpp-360 : YLVQQESPFVMMASAP  
 297 : orflpp-297 : DAVTAYNGYLTSSSK 329 : orflpp-329 : SFLGRYSALNHTTK 361 : orflpp-361 : ESPFVMMASAPPAQE  
 298 : orflpp-298 : YNGYLTSSSKTPEEH 330 : orflpp-330 : YMSALNHTTKWKYPQ 362 : orflpp-362 : MMSAPPAQELKHGT  
 299 : orflpp-299 : TSSSKTPEEHFIETI 331 : orflpp-331 : NHTKKWKYPQVNGLT 363 : orflpp-363 : PAQYELKHGTFTCAS  
 300 : orflpp-300 : TPEEHFIETISLAGS 332 : orflpp-332 : WKYPQVNGLTSIKWA 364 : orflpp-364 : LKHGTFTCASEYTG  
 301 : orflpp-301 : FIETISLAGSYKDWS 333 : orflpp-333 : VNGLTSIKWADNNCY 365 : orflpp-365 : FTCASEYTGNYQCGH  
 302 : orflpp-302 : SLAGSYKDWYSYGQS 334 : orflpp-334 : SIKWADNNCYLATAL 366 : orflpp-366 : EYTGNYQCGHYKHIT  
 303 : orflpp-303 : YKDWYSYGQSTQLGI 335 : orflpp-335 : DNNCYLATALTLQ 367 : orflpp-367 : YQCGHYKHITSKETL  
 304 : orflpp-304 : YSQGSTQLGIEFLKR 336 : orflpp-336 : LATALTLQQLIELKF 368 : orflpp-368 : YKHITSKETLYCIDG  
 305 : orflpp-305 : TQLGIEFLKRGDKSV 337 : orflpp-337 : LTLQQLIELKFNPAL 369 : orflpp-369 : SKETLYCIDGALLTK  
 306 : orflpp-306 : EFLKRGDKSVYYTSN 338 : orflpp-338 : IELKFNPALQDAY 370 : orflpp-370 : YCIDGALLTKSSEYK  
 307 : orflpp-307 : GDKSVYYTSNPTTFH 339 : orflpp-339 : NPPALQDAYYRARAG 371 : orflpp-371 : ALLTKSSEYKGPITD  
 308 : orflpp-308 : YYTSNPTTFHLDGEV 340 : orflpp-340 : QDAYYRARAGEAANF 372 : orflpp-372 : SSEYKGPITDVFYKE  
 309 : orflpp-309 : PTFHLDGEVITFDN 341 : orflpp-341 : RARAGEAANFCALIL 373 : orflpp-373 : GPITDVFYKENSYTT  
 310 : orflpp-310 : LDGEVITFDNLKTL 342 : orflpp-342 : EAANFCALILAYCNK 374 : orflpp-374 : VFYKENSYTTTIKPV  
 311 : orflpp-311 : ITFDNLKTLTLLSREV 343 : orflpp-343 : CALILAYCNKTVGEL 375 : orflpp-375 : NSYTTTIKPVTYKLD  
 312 : orflpp-312 : LKTLTLLSREVRTIKV 344 : orflpp-344 : AYCNCNKTGELGDV 376 : orflpp-376 : TIKPVTYKLDGCVCT  
 313 : orflpp-313 : SLREVRTIKVFTTVD 345 : orflpp-345 : TVGELGDVRETMSYL  
 314 : orflpp-314 : RTIKVFTTVDNINLH 346 : orflpp-346 : GDVRETMSYLFQHAN

RACK LAYOUT FOR SYNTHESIS :

**31751 : Rack E**

DESCRIPTION : 564 peptides based on sequences provided.

COMMENTS: Peptides despatched dried down.  
All controls have been removed for QC testing.

| A1  | A2  | A3  | A4  | A5  | A6  | A7  | A8  | A9  | A10 | A11 | A12 |
|-----|-----|-----|-----|-----|-----|-----|-----|-----|-----|-----|-----|
| 377 | 385 | 393 | 401 | 409 | 417 | 425 | 433 | 441 | 449 | 457 | 465 |
| B1  | B2  | B3  | B4  | B5  | B6  | B7  | B8  | B9  | B10 | B11 | B12 |
| 378 | 386 | 394 | 402 | 410 | 418 | 426 | 434 | 442 | 450 | 458 | 466 |
| C1  | C2  | C3  | C4  | C5  | C6  | C7  | C8  | C9  | C10 | C11 | C12 |
| 379 | 387 | 395 | 403 | 411 | 419 | 427 | 435 | 443 | 451 | 459 | 467 |
| D1  | D2  | D3  | D4  | D5  | D6  | D7  | D8  | D9  | D10 | D11 | D12 |
| 380 | 388 | 396 | 404 | 412 | 420 | 428 | 436 | 444 | 452 | 460 | 468 |
| E1  | E2  | E3  | E4  | E5  | E6  | E7  | E8  | E9  | E10 | E11 | E12 |
| 381 | 389 | 397 | 405 | 413 | 421 | 429 | 437 | 445 | 453 | 461 | 469 |
| F1  | F2  | F3  | F4  | F5  | F6  | F7  | F8  | F9  | F10 | F11 | F12 |
| 382 | 390 | 398 | 406 | 414 | 422 | 430 | 438 | 446 | 454 | 462 | 470 |
| G1  | G2  | G3  | G4  | G5  | G6  | G7  | G8  | G9  | G10 | G11 | G12 |
| 383 | 391 | 399 | 407 | 415 | 423 | 431 | 439 | 447 | 455 | 463 |     |
| H1  | H2  | H3  | H4  | H5  | H6  | H7  | H8  | H9  | H10 | H11 | H12 |
| 384 | 392 | 400 | 408 | 416 | 424 | 432 | 440 | 448 | 456 | 464 |     |

377 : orflpp-377 : TYKLDGVVCTEIDPK 409 : orflpp-409 : CEDLKPVSEEVVENP 441 : orflpp-441 : NTVKSVGKFCLEASF  
 378 : orflpp-378 : GVVCTEIDPKLDNYY 410 : orflpp-410 : PVSEEVVENPTIQKD 442 : orflpp-442 : VGKFCLEASFNYLKS  
 379 : orflpp-379 : EIDPKLDNYYKKDNS 411 : orflpp-411 : VVENPTIQKDVLECN 443 : orflpp-443 : LEASFNYLKS PNFSK  
 380 : orflpp-380 : LDNYYKKDNSYFTEQ 412 : orflpp-412 : TIQKDVLECNVKTTE 444 : orflpp-444 : NYLKS PNFSKLINII  
 381 : orflpp-381 : KKDNSYFTEQPIDLV 413 : orflpp-413 : VLECNVKTTEVVGDI 445 : orflpp-445 : PNFSKLINIIWFL  
 382 : orflpp-382 : YFTEQPIDLVNPQPY 414 : orflpp-414 : VKTTEVVGDIILKPA 446 : orflpp-446 : LINIIWFLLLSVCL  
 383 : orflpp-383 : PIDLVNPQYPNASF 415 : orflpp-415 : VVGDIILKPANNSLK 447 : orflpp-447 : IWFLLLSVCLGSLIY  
 384 : orflpp-384 : PNQYPNASFDNFKF 416 : orflpp-416 : ILKPANNSLKITEEV 448 : orflpp-448 : LSVCLGSLIYSTAAL  
 385 : orflpp-385 : PNASFDNFKFVCDNI 417 : orflpp-417 : NNSLKITEEVGHDTL 449 : orflpp-449 : GSLIYSTAALGVLMS  
 386 : orflpp-386 : DNFKFVCDNIKFADD 418 : orflpp-418 : ITEEVGHTDLMAAYV 450 : orflpp-450 : STAALGVLMSNLGMP  
 387 : orflpp-387 : VCDNIKFADDLNQLT 419 : orflpp-419 : GHTDLMAAYVDNSSL 451 : orflpp-451 : GVLMSNLGMP SYCTG  
 388 : orflpp-388 : KFADDLNQLTGYYKK 420 : orflpp-420 : MAAYVDNSSLTIKKP 452 : orflpp-452 : NLGMP SYCTGYREGY  
 389 : orflpp-389 : LNQLTGYYKPPASREL 421 : orflpp-421 : DNSSLTIKKPNELSR 453 : orflpp-453 : SYCTGYREGYLNSTN  
 390 : orflpp-390 : GYKPPASRELKVTFF 422 : orflpp-422 : TIKKPNELSRVLGLK 454 : orflpp-454 : YREGYLNSTNVTIAT  
 391 : orflpp-391 : ASRELKVTFFPDLNG 423 : orflpp-423 : NELSRVLGLKTLATH 455 : orflpp-455 : LNSTNVTIATYCTGS  
 392 : orflpp-392 : KVTFFPDLNGDVVAI 424 : orflpp-424 : VLGLKTLATHGLAAV 456 : orflpp-456 : VTIATYCTGSIPCSV  
 393 : orflpp-393 : PDLNGDVVAIDYKHY 425 : orflpp-425 : TLATHGLAAVNSVPW 457 : orflpp-457 : YCTGSIPCSVCLSGL  
 394 : orflpp-394 : DVVAIDYKHYTPSFK 426 : orflpp-426 : GLAAVNSVPWDTIAN 458 : orflpp-458 : IPCSVCLSGLDSLDT  
 395 : orflpp-395 : DYKHYTPSFKKGAKL 427 : orflpp-427 : NSVPWDTIANYAKPF 459 : orflpp-459 : CLSGLDSLDTYPSLE  
 396 : orflpp-396 : TPSFKKGAKLLHKPI 428 : orflpp-428 : DTIANYAKPFLNKVV 460 : orflpp-460 : DSLDTYPSLETIQIT  
 397 : orflpp-397 : KGAKLLHKPIVWHVN 429 : orflpp-429 : YAKPFLNKVVSTTTN 461 : orflpp-461 : YPSLETIQITISSFK  
 398 : orflpp-398 : LHKPIVWHVNNATNK 430 : orflpp-430 : LNKVVSTTTNIVTRC 462 : orflpp-462 : TIQITISSFKWDLTA  
 399 : orflpp-399 : VWHVNNATNKATYKP 431 : orflpp-431 : STTTNIVTRCLNRVC 463 : orflpp-463 : ISSFKWDLTAFGLVA  
 400 : orflpp-400 : NATNKATYKNTWCI 432 : orflpp-432 : IVTRCLNRVCNLYMP 464 : orflpp-464 : WDLTAFGLVAEWFLE  
 401 : orflpp-401 : ATYKNTWCI RCLWS 433 : orflpp-433 : LNRVCTNLYMPYFFTL 465 : orflpp-465 : FGLVAEWFLEYILFT  
 402 : orflpp-402 : NTWCI RCLWSTKPVE 434 : orflpp-434 : TNYMPYFFTL LLLQLC 466 : orflpp-466 : EWFLEYILFTRFFYV  
 403 : orflpp-403 : RCLWSTKPVETSNSF 435 : orflpp-435 : YFFTL LLLQLCTFTRS 467 : orflpp-467 : YILFTRFFYV LGLAA  
 404 : orflpp-404 : TKPVETSNSFDVLKS 436 : orflpp-436 : LLQLCTFTRSTNSRI 468 : orflpp-468 : RFFYV LGLAAIMQLF  
 405 : orflpp-405 : TSNSFDVLKSEDAQG 437 : orflpp-437 : FTTRSTNSRIKASMP 469 : orflpp-469 : LGLAAIMQLFFSYFA  
 406 : orflpp-406 : DVLKSEDAQGMNDLA 438 : orflpp-438 : TNSRIKASMP TTIAK 470 : orflpp-470 : IMQLFFSYFAVHFIS  
 407 : orflpp-407 : EDAQGMNDLACEDLK 439 : orflpp-439 : KASMP TTIAKNTVKS  
 408 : orflpp-408 : MDNLACEDLKPVSEE 440 : orflpp-440 : TTIAKNTVKS VGKFC

RACK LAYOUT FOR SYNTHESIS :

**31751 : Rack F**

DESCRIPTION : 564 peptides based on sequences provided.

COMMENTS: Peptides despatched dried down.  
All controls have been removed for QC testing.

| A1  | A2  | A3  | A4  | A5  | A6  | A7  | A8  | A9  | A10 | A11 | A12 |
|-----|-----|-----|-----|-----|-----|-----|-----|-----|-----|-----|-----|
| 471 | 479 | 487 | 495 | 503 | 511 | 519 | 527 | 535 | 543 | 551 | 559 |
| B1  | B2  | B3  | B4  | B5  | B6  | B7  | B8  | B9  | B10 | B11 | B12 |
| 472 | 480 | 488 | 496 | 504 | 512 | 520 | 528 | 536 | 544 | 552 | 560 |
| C1  | C2  | C3  | C4  | C5  | C6  | C7  | C8  | C9  | C10 | C11 | C12 |
| 473 | 481 | 489 | 497 | 505 | 513 | 521 | 529 | 537 | 545 | 553 | 561 |
| D1  | D2  | D3  | D4  | D5  | D6  | D7  | D8  | D9  | D10 | D11 | D12 |
| 474 | 482 | 490 | 498 | 506 | 514 | 522 | 530 | 538 | 546 | 554 | 562 |
| E1  | E2  | E3  | E4  | E5  | E6  | E7  | E8  | E9  | E10 | E11 | E12 |
| 475 | 483 | 491 | 499 | 507 | 515 | 523 | 531 | 539 | 547 | 555 | 563 |
| F1  | F2  | F3  | F4  | F5  | F6  | F7  | F8  | F9  | F10 | F11 | F12 |
| 476 | 484 | 492 | 500 | 508 | 516 | 524 | 532 | 540 | 548 | 556 | 564 |
| G1  | G2  | G3  | G4  | G5  | G6  | G7  | G8  | G9  | G10 | G11 | G12 |
| 477 | 485 | 493 | 501 | 509 | 517 | 525 | 533 | 541 | 549 | 557 |     |
| H1  | H2  | H3  | H4  | H5  | H6  | H7  | H8  | H9  | H10 | H11 | H12 |
| 478 | 486 | 494 | 502 | 510 | 518 | 526 | 534 | 542 | 550 | 558 |     |

471 : orflpp-471 : FSYFAVHFISNSWLM 503 : orflpp-503 : KTYERHSLSHFVNLD 535 : orflpp-535 : NNYMLTYNKVENMTP  
 472 : orflpp-472 : VHFISNSWLMWLIIN 504 : orflpp-504 : HSLSHFVNLDNLRAN 536 : orflpp-536 : TYNKVENMTPRDLGA  
 473 : orflpp-473 : NSWLMWLIINLVQMA 505 : orflpp-505 : FVNLDNLRANNTKGS 537 : orflpp-537 : ENMTPRDLGACIDCS  
 474 : orflpp-474 : WLIINLVQMAPISAM 506 : orflpp-506 : NLRANNTKGS LPI NV 538 : orflpp-538 : RDLGACIDCSARHIN  
 475 : orflpp-475 : LVQMAPISAMVRMYI 507 : orflpp-507 : NTKGSLPINVIVFDG 539 : orflpp-539 : CIDCSARHINAQVAK  
 476 : orflpp-476 : PISAMVRMYIFFASF 508 : orflpp-508 : LPINVIVFDGKSKCE 540 : orflpp-540 : ARHINAQVAKSHNIA  
 477 : orflpp-477 : VRMYIFFASFYVVK 509 : orflpp-509 : IVFDGKSKCEESSAK 541 : orflpp-541 : AQVAKSHNIALIWNV  
 478 : orflpp-478 : FFASFYVVKSYVHV 510 : orflpp-510 : KSKCEESSAKSASVY 542 : orflpp-542 : SHNIALIWNVKDFMS  
 479 : orflpp-479 : YYVWKS YVHVVDGCN 511 : orflpp-511 : ESSAKSASVYYSQLM 543 : orflpp-543 : LIWNVKDFMSLSEQL  
 480 : orflpp-480 : SYVHVVDGCNSSTCM 512 : orflpp-512 : SASVYYSQLMCQPIL 544 : orflpp-544 : KDFMSLSEQLRKQIR  
 481 : orflpp-481 : VDGCSSTCMMCYKR 513 : orflpp-513 : YSQLMCQPILLDQA 545 : orflpp-545 : LSEQLRKQIRSAAKK  
 482 : orflpp-482 : SSTCMMCYKRNRATR 514 : orflpp-514 : CQPILLDQALVSDV 546 : orflpp-546 : RKQIRSAAKKNNLFP  
 483 : orflpp-483 : MCYKRNRATRVECTT 515 : orflpp-515 : LLDQALVSDVGDSDAE 547 : orflpp-547 : SAAKNNLFPKLTCA  
 484 : orflpp-484 : NRATRVECTTIVNGV 516 : orflpp-516 : LVSDVGDSDAEVAVKM 548 : orflpp-548 : NNLFPKLTCAATTRQV  
 485 : orflpp-485 : VECTTIVNGVRRSFY 517 : orflpp-517 : GDSAEVAVKMFDAYV 549 : orflpp-549 : KLTCATTRQVVNVVIT  
 486 : orflpp-486 : IVNGVRRSFYVYANG 518 : orflpp-518 : VAVKMFDAYVNTFSS 550 : orflpp-550 : TTRQVVNVVTTKIAL  
 487 : orflpp-487 : RRSFYVYANGGKGF 519 : orflpp-519 : FDAYVNTFSSTFNVP 551 : orflpp-551 : VNVVTTKIALKGGKI  
 488 : orflpp-488 : VYANGGKGFCKLHNW 520 : orflpp-520 : NTFSSTFNVPMEK 552 : orflpp-552 : TKIALKGGKIVNNWL  
 489 : orflpp-489 : GKGFKLHNWNCVNC 521 : orflpp-521 : TFNVPMEKLTLVAT 553 : orflpp-553 : KGGKIVNNWLKQLIK  
 490 : orflpp-490 : KLHNWNCVNCDFCA 522 : orflpp-522 : MEKLTLVATAEAE 554 : orflpp-554 : VNNWLKQLIKVTLVF  
 491 : orflpp-491 : NCVNCDFCAGSTFI 523 : orflpp-523 : TLVATAEAE LAKNV 555 : orflpp-555 : KQLIKVTLVFLVAA  
 492 : orflpp-492 : DTFCAGSTFISDEVA 524 : orflpp-524 : AEAELAKNVSLDN 556 : orflpp-556 : VTLVFLVAAIFLYLI  
 493 : orflpp-493 : GSTFISDEVALDLSL 525 : orflpp-525 : AKNVSLDNVSLTF 557 : orflpp-557 : LFVAAIFYLITPVHV  
 494 : orflpp-494 : SDEVARDLSLQFKRP 526 : orflpp-526 : LDNVSLTFISARQ 558 : orflpp-558 : IFYLITPVHVMSKHT  
 495 : orflpp-495 : RDLSLQFKRPINPTD 527 : orflpp-527 : STFISARQGFVDS 559 : orflpp-559 : TPVHVMSKHTDFSSE  
 496 : orflpp-496 : QFKRPINPTDQSSYI 528 : orflpp-528 : AARQGFVDSVETKD 560 : orflpp-560 : MSKHTDFSSEIIGYK  
 497 : orflpp-497 : INPTDQSSYIVDSVT 529 : orflpp-529 : FVDSVETKDVVECL 561 : orflpp-561 : DFSSEIIGYKAIDGG  
 498 : orflpp-498 : QSSYIVDSVTVKNGS 530 : orflpp-530 : VETKDVVECLKLSHQ 562 : orflpp-562 : IIGYKAIDGGVTRDI  
 499 : orflpp-499 : VDSVTVKNGSIHLYF 531 : orflpp-531 : VVECLKLSHQSDIEV 563 : orflpp-563 : AIDGGVTRDIASDT  
 500 : orflpp-500 : VKNGSIHLYFDKAGQ 532 : orflpp-532 : KLSHQSDIEVTGDSC 564 : orflpp-564 : VTRDIASDTCTCFANK  
 501 : orflpp-501 : IHLYFDKAGQKTYER 533 : orflpp-533 : SDIEVTGDSCNNYML  
 502 : orflpp-502 : DKAGQKTYERHSLSH 534 : orflpp-534 : TGDSCNNYMLTYNKV

RACK LAYOUT FOR SYNTHESIS :

**31752 : Rack A**

DESCRIPTION : 564 peptides based on sequences provided.

COMMENTS: Peptides despatched dried down.  
All controls have been removed for QC testing.

|    |    |    |    |    |    |    |    |    |     |     |     |
|----|----|----|----|----|----|----|----|----|-----|-----|-----|
| A1 | A2 | A3 | A4 | A5 | A6 | A7 | A8 | A9 | A10 | A11 | A12 |
| 1  | 9  | 17 | 25 | 33 | 41 | 49 | 57 | 65 | 73  | 81  | 89  |
| B1 | B2 | B3 | B4 | B5 | B6 | B7 | B8 | B9 | B10 | B11 | B12 |
| 2  | 10 | 18 | 26 | 34 | 42 | 50 | 58 | 66 | 74  | 82  | 90  |
| C1 | C2 | C3 | C4 | C5 | C6 | C7 | C8 | C9 | C10 | C11 | C12 |
| 3  | 11 | 19 | 27 | 35 | 43 | 51 | 59 | 67 | 75  | 83  | 91  |
| D1 | D2 | D3 | D4 | D5 | D6 | D7 | D8 | D9 | D10 | D11 | D12 |
| 4  | 12 | 20 | 28 | 36 | 44 | 52 | 60 | 68 | 76  | 84  | 92  |
| E1 | E2 | E3 | E4 | E5 | E6 | E7 | E8 | E9 | E10 | E11 | E12 |
| 5  | 13 | 21 | 29 | 37 | 45 | 53 | 61 | 69 | 77  | 85  | 93  |
| F1 | F2 | F3 | F4 | F5 | F6 | F7 | F8 | F9 | F10 | F11 | F12 |
| 6  | 14 | 22 | 30 | 38 | 46 | 54 | 62 | 70 | 78  | 86  | 94  |
| G1 | G2 | G3 | G4 | G5 | G6 | G7 | G8 | G9 | G10 | G11 | G12 |
| 7  | 15 | 23 | 31 | 39 | 47 | 55 | 63 | 71 | 79  | 87  |     |
| H1 | H2 | H3 | H4 | H5 | H6 | H7 | H8 | H9 | H10 | H11 | H12 |
| 8  | 16 | 24 | 32 | 40 | 48 | 56 | 64 | 72 | 80  | 88  |     |

- |                 |                    |                 |                   |                 |                    |
|-----------------|--------------------|-----------------|-------------------|-----------------|--------------------|
| 1 : orflpp-565  | : ASTDTCFANKHADFD  | 33 : orflpp-597 | : SEYCRHGTCESEAG  | 65 : orflpp-629 | : TIAYIICISTKHFYW  |
| 2 : orflpp-566  | : CFANKHADFDTWFSQ  | 34 : orflpp-598 | : HGTCERSEAGVCVST | 66 : orflpp-630 | : ICISTKHFYWFFSNY  |
| 3 : orflpp-567  | : HADFDTWFSQRGGSY  | 35 : orflpp-599 | : RSEAGVCVSTSGRWV | 67 : orflpp-631 | : KHFYWFFSNYLKRRV  |
| 4 : orflpp-568  | : TWFSQRGGSYTNDKA  | 36 : orflpp-600 | : VCVSTSGRWVLNNDY | 68 : orflpp-632 | : FFSNYLKRRVVFNGV  |
| 5 : orflpp-569  | : RGGSYTNDKACPLIA  | 37 : orflpp-601 | : SGRWVLNNDYRSLP  | 69 : orflpp-633 | : LKRRVVFNGVSFSTF  |
| 6 : orflpp-570  | : TNDKACPLIAAVITR  | 38 : orflpp-602 | : LNNDYRSLPGVFCG  | 70 : orflpp-634 | : VFNGVSFSTFEEAAL  |
| 7 : orflpp-571  | : CPLIAAVITREVGTV  | 39 : orflpp-603 | : YRSLPGVFCGVDAVN | 71 : orflpp-635 | : SFSTFEEAALCTFLL  |
| 8 : orflpp-572  | : AVITREVGTVVPLGL  | 40 : orflpp-604 | : GVFCGVDAVNLLTNM | 72 : orflpp-636 | : EEALCTFLLNKEMY   |
| 9 : orflpp-573  | : EVGVVPLGLPGTILR  | 41 : orflpp-605 | : VDAVNLLTNMFTPLI | 73 : orflpp-637 | : CTFLLNKEMYLKLRS  |
| 10 : orflpp-574 | : VPLGLPGTILRTTNGD | 42 : orflpp-606 | : LLTNMFTPLIQPIGA | 74 : orflpp-638 | : NKEMYLKLRSVDVLLP |
| 11 : orflpp-575 | : GTILRTTNGDFLHFL  | 43 : orflpp-607 | : FTPLIQPIGALDISA | 75 : orflpp-639 | : LKLRSVDVLLPLTQYN |
| 12 : orflpp-576 | : TTNGDFLHFLPRVFS  | 44 : orflpp-608 | : QPIGALDISASIVAG | 76 : orflpp-640 | : DVLLPLTQYNRYLAL  |
| 13 : orflpp-577 | : FLHFLPRVFSAVGNI  | 45 : orflpp-609 | : LDISASIVAGGIVAI | 77 : orflpp-641 | : LTQYNRYLALYNKYK  |
| 14 : orflpp-578 | : PRVFSAVGNICYTPS  | 46 : orflpp-610 | : SIVAGGIVAVVTCL  | 78 : orflpp-642 | : RYLALYNKYKYFSGA  |
| 15 : orflpp-579 | : AVGNICYTPSKLIEY  | 47 : orflpp-611 | : GIVAVVTCLAYYFM  | 79 : orflpp-643 | : YNKYKYFSGAMDSTS  |
| 16 : orflpp-580 | : CYTPSKLIEYDFAT   | 48 : orflpp-612 | : VVTCLAYYFMRFRRA | 80 : orflpp-644 | : YFSGAMDSTSYREAA  |
| 17 : orflpp-581 | : KLIEYDFATSACVL   | 49 : orflpp-613 | : AYYFMRFRRAFGEYS | 81 : orflpp-645 | : MDTTSYREAACCHLA  |
| 18 : orflpp-582 | : TDFATSACVLAAECT  | 50 : orflpp-614 | : RFRRAFGEYSHVVA  | 82 : orflpp-646 | : YREAACCHLAKALND  |
| 19 : orflpp-583 | : SACVLAAECTIFKDA  | 51 : orflpp-615 | : FGEYSHVVAFNTLLF | 83 : orflpp-647 | : CCHLAKALNDFSNSG  |
| 20 : orflpp-584 | : AAECTIFKDASGKPV  | 52 : orflpp-616 | : HVVAFNTLLFLMSFT | 84 : orflpp-648 | : KALNDFSNSGSDVLY  |
| 21 : orflpp-585 | : IFKDASGKPVPCYD   | 53 : orflpp-617 | : NTLLFLMSFTVLCLT | 85 : orflpp-649 | : FNSGSDVLYQPPQT   |
| 22 : orflpp-586 | : SGKPVPCYDNTVLE   | 54 : orflpp-618 | : LMSFTVLCLTPVYSF | 86 : orflpp-650 | : SDVLYQPPQTSITSA  |
| 23 : orflpp-587 | : PCYDNTVLEGSVAY   | 55 : orflpp-619 | : VLCLTPVYSFLPGVY | 87 : orflpp-651 | : QPPQTSITSAVLQSG  |
| 24 : orflpp-588 | : TNVLEGSVAYESLRP  | 56 : orflpp-620 | : PVYSFLPGVYSVIYL | 88 : orflpp-652 | : SITSAVLQSGFRKMA  |
| 25 : orflpp-589 | : GSVAYESLRPDRYV   | 57 : orflpp-621 | : LPGVYSVIYLYLTFY | 89 : orflpp-653 | : VLQSGFRKMAFPSPGK |
| 26 : orflpp-590 | : ESLRPDRYVLMVLDGS | 58 : orflpp-622 | : SVIYLYLTFYLTNDV | 90 : orflpp-654 | : FRKMAFPSPGKVEGCM |
| 27 : orflpp-591 | : DRYVLMVLDGSIQFP  | 59 : orflpp-623 | : YLTFYLTNDVSFLAH | 91 : orflpp-655 | : FPSGKVEGCMVQVTC  |
| 28 : orflpp-592 | : LMDGSIQFPNTYLE   | 60 : orflpp-624 | : LTNDVSFLAHIQWVM | 92 : orflpp-656 | : VEGCMVQVTCGTTTL  |
| 29 : orflpp-593 | : IIQFPNTYLEGSRV   | 61 : orflpp-625 | : SFLAHIQWVMVFTPL | 93 : orflpp-657 | : VQVTCGTTTLNGLWL  |
| 30 : orflpp-594 | : NTYLEGSRVVTTFD   | 62 : orflpp-626 | : IQWVMVFTPLVPFWI | 94 : orflpp-658 | : GTTTLNGLWLDDVVY  |
| 31 : orflpp-595 | : GSRVVTTFDSEYCR   | 63 : orflpp-627 | : MFTPLVPFWITIAI  |                 |                    |
| 32 : orflpp-596 | : VTFDSEYCRHGTC    | 64 : orflpp-628 | : VPFWITIAIICIST  |                 |                    |

RACK LAYOUT FOR SYNTHESIS :

**31752 : Rack B**

DESCRIPTION : 564 peptides based on sequences provided.

COMMENTS: Peptides despatched dried down.  
All controls have been removed for QC testing.

|     |     |     |     |     |     |     |     |     |     |     |     |
|-----|-----|-----|-----|-----|-----|-----|-----|-----|-----|-----|-----|
| A1  | A2  | A3  | A4  | A5  | A6  | A7  | A8  | A9  | A10 | A11 | A12 |
| 95  | 103 | 111 | 119 | 127 | 135 | 143 | 151 | 159 | 167 | 175 | 183 |
| B1  | B2  | B3  | B4  | B5  | B6  | B7  | B8  | B9  | B10 | B11 | B12 |
| 96  | 104 | 112 | 120 | 128 | 136 | 144 | 152 | 160 | 168 | 176 | 184 |
| C1  | C2  | C3  | C4  | C5  | C6  | C7  | C8  | C9  | C10 | C11 | C12 |
| 97  | 105 | 113 | 121 | 129 | 137 | 145 | 153 | 161 | 169 | 177 | 185 |
| D1  | D2  | D3  | D4  | D5  | D6  | D7  | D8  | D9  | D10 | D11 | D12 |
| 98  | 106 | 114 | 122 | 130 | 138 | 146 | 154 | 162 | 170 | 178 | 186 |
| E1  | E2  | E3  | E4  | E5  | E6  | E7  | E8  | E9  | E10 | E11 | E12 |
| 99  | 107 | 115 | 123 | 131 | 139 | 147 | 155 | 163 | 171 | 179 | 187 |
| F1  | F2  | F3  | F4  | F5  | F6  | F7  | F8  | F9  | F10 | F11 | F12 |
| 100 | 108 | 116 | 124 | 132 | 140 | 148 | 156 | 164 | 172 | 180 | 188 |
| G1  | G2  | G3  | G4  | G5  | G6  | G7  | G8  | G9  | G10 | G11 | G12 |
| 101 | 109 | 117 | 125 | 133 | 141 | 149 | 157 | 165 | 173 | 181 |     |
| H1  | H2  | H3  | H4  | H5  | H6  | H7  | H8  | H9  | H10 | H11 | H12 |
| 102 | 110 | 118 | 126 | 134 | 142 | 150 | 158 | 166 | 174 | 182 |     |

95 : orflpp-659 : NGLWLDDVVCPRHV127 : orflpp-691 : RQTAQAAGTDTTITV159 : orflpp-723 : FLFPFAMGIIAMSAFA  
 96 : orflpp-660 : DDVVCPRHVICTSEI128 : orflpp-692 : AAGTDTTITVNVLAW160 : orflpp-724 : MGIAMSAFAMMFVK  
 97 : orflpp-661 : CPRHVICTSEDMLNPI129 : orflpp-693 : TTITVNVLAWLYAAV161 : orflpp-725 : MSAFAMMFVKHKHAF  
 98 : orflpp-662 : ICTSEDMLNPNYEDLI130 : orflpp-694 : NVLAWLYAAVINGDR162 : orflpp-726 : MMFVKHKHAFCLCLFL  
 99 : orflpp-663 : DMLNPNYEDLLIRKSI131 : orflpp-695 : LYAAVINGDRWFLNR163 : orflpp-727 : HKHAFCLCLFLLPSLA  
 100 : orflpp-664 : NYEDLLIRKSNHNFLI132 : orflpp-696 : INGDRWFLNRFTTTL164 : orflpp-728 : LCLFLLPSLATVAYF  
 101 : orflpp-665 : LIRKSNHNFLVQAGM133 : orflpp-697 : WFLNRFTTTLNDFNL165 : orflpp-729 : LPSLATVAYFNMVYM  
 102 : orflpp-666 : NHNFLVQAGNVQLRV134 : orflpp-698 : FTTTLNDFNLVAMKY166 : orflpp-730 : TVAYFNMVYMPASWV  
 103 : orflpp-667 : VQAGNVQLRVIGHSM135 : orflpp-699 : NDFNLVAMKYNYEPI167 : orflpp-731 : NMVYMPASWVMRIMT  
 104 : orflpp-668 : VQLRVIGHSMQNCVLI136 : orflpp-700 : VAMKYNYEPLTQDHV168 : orflpp-732 : PASWVMRIMTWLDMV  
 105 : orflpp-669 : IGHSMQNCVCLKKVD137 : orflpp-701 : NYEPLTQDHDVILGP169 : orflpp-733 : MRIMTWLDMVDTLSL  
 106 : orflpp-670 : QNCVCLKKVDTANPK138 : orflpp-702 : TQDHDVILGPLSAQT170 : orflpp-734 : WLDMVDTLSLGFKLK  
 107 : orflpp-671 : KKKVDTANPKTPKYK139 : orflpp-703 : DILGPLSAQTGIAVI171 : orflpp-735 : DTLSGFKLKDCVMY  
 108 : orflpp-672 : TANPKTPKYKFVRIQ140 : orflpp-704 : LSAQTGIAVLDMCAS172 : orflpp-736 : GFKLKDCVMYASAV  
 109 : orflpp-673 : TPKYKFVRIQPGQTF141 : orflpp-705 : GIAVLDMCASLKELL173 : orflpp-737 : DCVMYASAVVLLIIM  
 110 : orflpp-674 : FVRIQPGQTFSVLAC142 : orflpp-706 : DMCASLKELLQNGMN174 : orflpp-738 : ASAVVLLIIMTARTV  
 111 : orflpp-675 : PGQTFSVLACYNGSP143 : orflpp-707 : LKELLQNGMNGRTII175 : orflpp-739 : LLILMTARTVYDDGA  
 112 : orflpp-676 : SVLACYNGSPSGVYQ144 : orflpp-708 : QNGMNGRTILGSALI176 : orflpp-740 : TARTVYDDGARRVWT  
 113 : orflpp-677 : YNGSPSGVYQCAMRP145 : orflpp-709 : GRTILGSALLEDEFT177 : orflpp-741 : YDDGARRVWTLMNVL  
 114 : orflpp-678 : SGVYQCAMRPNFTIK146 : orflpp-710 : GSALLEDEFTPFDDV178 : orflpp-742 : RRVWTLMNVLTLVYK  
 115 : orflpp-679 : CAMRPNFTIKGSFLM147 : orflpp-711 : EDEFTPFDDVVRQC179 : orflpp-743 : LMNVLTLVYKVYYGN  
 116 : orflpp-680 : NFTIKGSFLNGSCGS148 : orflpp-712 : PFDVVRQC179 : orflpp-744 : TLVYKVYYGNALDQA  
 117 : orflpp-681 : GSFNGSCGSVGFNI149 : orflpp-713 : RQC179 : orflpp-745 : VYGNALDQAISMWA  
 118 : orflpp-682 : GSGSVGFNIDYDCV150 : orflpp-714 : VTFQSAVKRTIKGTH182 : orflpp-746 : VTFQSAVKRTIKGTH182 : orflpp-746 : LIISVTSNYSVTSNYS  
 119 : orflpp-683 : VGFNIDYDCVSFCYM151 : orflpp-715 : AVKRTIKGTHHWLL183 : orflpp-747 : ISMWALIIISVTSNYS  
 120 : orflpp-684 : DYDCVSFCYMHMEL152 : orflpp-716 : IKGTHHWLLLTILTS184 : orflpp-748 : LIISVTSNYSVTVTT  
 121 : orflpp-685 : SFCYMHMELPTGVH153 : orflpp-717 : HWLLLTILTSLLVLM185 : orflpp-749 : TSNYSVTVTTVMFLA  
 122 : orflpp-686 : HHMELPTGVHAGTDL154 : orflpp-718 : TILTSLVQSTQW186 : orflpp-750 : GVVTTVMFLARGIVE  
 123 : orflpp-687 : PTGVHAGTDLEGNFY155 : orflpp-719 : LLVLVQSTQW187 : orflpp-751 : VMFLARGIVFMCVEY  
 124 : orflpp-688 : AGTDLEGNFYGPFDV156 : orflpp-720 : QSTQW187 : orflpp-752 : RGIVFMCVEYCIPIFF  
 125 : orflpp-689 : EGNFYGPFDVDRQTAQ157 : orflpp-721 : SLFFFLYENAFLPFA  
 126 : orflpp-690 : GPFVDRQTAQAAGTD158 : orflpp-722 : LYENAFLPFAMGIIA



RACK LAYOUT FOR SYNTHESIS :

31752 : Rack C

DESCRIPTION : 564 peptides based on sequences provided.

COMMENTS: Peptides despatched dried down.  
All controls have been removed for QC testing.

|     |     |     |     |     |     |     |     |     |     |     |     |
|-----|-----|-----|-----|-----|-----|-----|-----|-----|-----|-----|-----|
| A1  | A2  | A3  | A4  | A5  | A6  | A7  | A8  | A9  | A10 | A11 | A12 |
| 189 | 197 | 205 | 213 | 221 | 229 | 237 | 245 | 253 | 261 | 269 | 277 |
| B1  | B2  | B3  | B4  | B5  | B6  | B7  | B8  | B9  | B10 | B11 | B12 |
| 190 | 198 | 206 | 214 | 222 | 230 | 238 | 246 | 254 | 262 | 270 | 278 |
| C1  | C2  | C3  | C4  | C5  | C6  | C7  | C8  | C9  | C10 | C11 | C12 |
| 191 | 199 | 207 | 215 | 223 | 231 | 239 | 247 | 255 | 263 | 271 | 279 |
| D1  | D2  | D3  | D4  | D5  | D6  | D7  | D8  | D9  | D10 | D11 | D12 |
| 192 | 200 | 208 | 216 | 224 | 232 | 240 | 248 | 256 | 264 | 272 | 280 |
| E1  | E2  | E3  | E4  | E5  | E6  | E7  | E8  | E9  | E10 | E11 | E12 |
| 193 | 201 | 209 | 217 | 225 | 233 | 241 | 249 | 257 | 265 | 273 | 281 |
| F1  | F2  | F3  | F4  | F5  | F6  | F7  | F8  | F9  | F10 | F11 | F12 |
| 194 | 202 | 210 | 218 | 226 | 234 | 242 | 250 | 258 | 266 | 274 | 282 |
| G1  | G2  | G3  | G4  | G5  | G6  | G7  | G8  | G9  | G10 | G11 | G12 |
| 195 | 203 | 211 | 219 | 227 | 235 | 243 | 251 | 259 | 267 | 275 |     |
| H1  | H2  | H3  | H4  | H5  | H6  | H7  | H8  | H9  | H10 | H11 | H12 |
| 196 | 204 | 212 | 220 | 228 | 236 | 244 | 252 | 260 | 268 | 276 |     |

- 189 : orflpp-753 : MCVEYCPITFFITGN  
 190 : orflpp-754 : CPIFFITGNLQICIM  
 191 : orflpp-755 : ITGNLQICIMLVYCF  
 192 : orflpp-756 : LQCIMLVYCFGLGYFC  
 193 : orflpp-757 : LVYCFGLYFCTCYFC  
 194 : orflpp-758 : LGYFCTCYFGLFCL  
 195 : orflpp-759 : TCYFGLFCLLNRYFF  
 196 : orflpp-760 : LFCLLNRYFRLTLGV  
 197 : orflpp-761 : NRYFRLTLGVYDYL  
 198 : orflpp-762 : LTLGVYDYLVSTQ  
 199 : orflpp-763 : YDYLVSTQEFRYMNS  
 200 : orflpp-764 : STQEFRYMNSQGLL  
 201 : orflpp-765 : RYMNSQGLLPPKNS  
 202 : orflpp-766 : QGLLPPKNSIDAFKI  
 203 : orflpp-767 : PKNSIDAFKLNLIKLI  
 204 : orflpp-768 : DAFKLNLIKLLGVGGK  
 205 : orflpp-769 : NIKLLGVGGKPCIKV  
 206 : orflpp-770 : GVGKPCIKVATVQS  
 207 : orflpp-771 : PCIKVATVQSKMSDV  
 208 : orflpp-772 : ATVQSKMSDVKCTSV  
 209 : orflpp-773 : KMSDVKCTSVVLLS  
 210 : orflpp-774 : KCTSVVLLSVLQQL  
 211 : orflpp-775 : VLLSVLQQLRVLESS  
 212 : orflpp-776 : LQQLRVLESSKLWA  
 213 : orflpp-777 : VESSKLWAQCVQLH  
 214 : orflpp-778 : KLWAQCVQLHNDILI  
 215 : orflpp-779 : CVQLHNDILLAKDTT  
 216 : orflpp-780 : NDILLAKDTTEAFEF  
 217 : orflpp-781 : AKDTTEAFEFKMSV  
 218 : orflpp-782 : EAFEFKMSVLLSVLL  
 219 : orflpp-783 : MVSLLSVLLSMQGA  
 220 : orflpp-784 : SVLLSMQGAVDINKI  
 221 : orflpp-785 : MQGAVDINKLCEEMI  
 222 : orflpp-786 : DINKLCEEMLDNRAT  
 223 : orflpp-787 : CEEMLDNRATLQAI  
 224 : orflpp-788 : DNRATLQAIASEFSS  
 225 : orflpp-789 : LQAIASEFSSLPSY  
 226 : orflpp-790 : SEFSSLPSYAAFAT  
 227 : orflpp-791 : LPSYAAFATAQEAYE  
 228 : orflpp-792 : AFATAQEAYEQAVAN  
 229 : orflpp-793 : QEAYEQAVANGDSEV  
 230 : orflpp-794 : QAVANGDSEVVLLK  
 231 : orflpp-795 : GDSEVVLLKLLKSL  
 232 : orflpp-796 : VLLKLLKSLNVAKSE  
 233 : orflpp-797 : KSLNVAKSEFDRDA  
 234 : orflpp-798 : VAKSEFDRDAAMQR  
 235 : orflpp-799 : FDRDAAMQRKLEKM  
 236 : orflpp-800 : AMQRKLEKMADQAM  
 237 : orflpp-801 : LEKMADQAMTQMYK  
 238 : orflpp-802 : DQAMTQMYKQARSE  
 239 : orflpp-803 : QMYKQARSEDKRAK  
 240 : orflpp-804 : ARSEDKRAKVTSAM  
 241 : orflpp-805 : KRAKVTSAMQTMLF  
 242 : orflpp-806 : TSAMQTMLFTMLRK  
 243 : orflpp-807 : TMLFTMLRKLDND  
 244 : orflpp-808 : MLRKLDNDALNNI  
 245 : orflpp-809 : DNDALNNIINNARD  
 246 : orflpp-810 : NNIINNARDGCVPL  
 247 : orflpp-811 : NARDGCVPLNIIP  
 248 : orflpp-812 : CVPLNIIPLTTAAK  
 249 : orflpp-813 : IIPLTTAAKLMVVI  
 250 : orflpp-814 : TAAKLMVVIPIDYN  
 251 : orflpp-815 : MVVIPIDYNTRYKNT  
 252 : orflpp-816 : DYNTRYKNTCDGTFT  
 253 : orflpp-817 : KNTCDGTFTTYASAL  
 254 : orflpp-818 : GTFTTYASALWEIQ  
 255 : orflpp-819 : YASALWEIQQVVDAD  
 256 : orflpp-820 : WEIQQVVDADSKIV  
 257 : orflpp-821 : VVDADSKIVQLSEIS  
 258 : orflpp-822 : SKIVQLSEISMNSP  
 259 : orflpp-823 : LSEISMNSPNLAWP  
 260 : orflpp-824 : MDNSPNLAWPLIVTA  
 261 : orflpp-825 : NLAWPLIVTALRANS  
 262 : orflpp-826 : LIVTALRANSVAVKL  
 263 : orflpp-827 : LRANSVAVKLQNNEL  
 264 : orflpp-828 : AVKLQNNELSPVALR  
 265 : orflpp-829 : NNELSPVALRQMSCA  
 266 : orflpp-830 : PVALRQMSCAAGTTQ  
 267 : orflpp-831 : QMSCAAGTTQTACTD  
 268 : orflpp-832 : AGTTQTACTDDNALA  
 269 : orflpp-833 : TACTDDNALAYNNTT  
 270 : orflpp-834 : DNALAYNNTTKGGRF  
 271 : orflpp-835 : YNNTTKGGRFVLLAL  
 272 : orflpp-836 : KGGRFVLLALLSDLQD  
 273 : orflpp-837 : VLLALLSDLQDLKWAR  
 274 : orflpp-838 : SDLQDLKWARFPKSD  
 275 : orflpp-839 : LKWARFPKSDGTGTI  
 276 : orflpp-840 : FPKSDGTGTIYTELE  
 277 : orflpp-841 : GTGTIYTELEPPCRF  
 278 : orflpp-842 : YTELEPPCRFVTDTP  
 279 : orflpp-843 : PPCRFTVTDTPKPKV  
 280 : orflpp-844 : VTDTPKPKVKYLYF  
 281 : orflpp-845 : KPKVKYLYFIKGLN  
 282 : orflpp-846 : KYLYFIKGLNLLNRG

RACK LAYOUT FOR SYNTHESIS :

**31752 : Rack D**

DESCRIPTION : 564 peptides based on sequences provided.

COMMENTS: Peptides despatched dried down.  
All controls have been removed for QC testing.

| A1  | A2  | A3  | A4  | A5  | A6  | A7  | A8  | A9  | A10 | A11 | A12 |
|-----|-----|-----|-----|-----|-----|-----|-----|-----|-----|-----|-----|
| 283 | 291 | 299 | 307 | 315 | 323 | 331 | 339 | 347 | 355 | 363 | 371 |
| B1  | B2  | B3  | B4  | B5  | B6  | B7  | B8  | B9  | B10 | B11 | B12 |
| 284 | 292 | 300 | 308 | 316 | 324 | 332 | 340 | 348 | 356 | 364 | 372 |
| C1  | C2  | C3  | C4  | C5  | C6  | C7  | C8  | C9  | C10 | C11 | C12 |
| 285 | 293 | 301 | 309 | 317 | 325 | 333 | 341 | 349 | 357 | 365 | 373 |
| D1  | D2  | D3  | D4  | D5  | D6  | D7  | D8  | D9  | D10 | D11 | D12 |
| 286 | 294 | 302 | 310 | 318 | 326 | 334 | 342 | 350 | 358 | 366 | 374 |
| E1  | E2  | E3  | E4  | E5  | E6  | E7  | E8  | E9  | E10 | E11 | E12 |
| 287 | 295 | 303 | 311 | 319 | 327 | 335 | 343 | 351 | 359 | 367 | 375 |
| F1  | F2  | F3  | F4  | F5  | F6  | F7  | F8  | F9  | F10 | F11 | F12 |
| 288 | 296 | 304 | 312 | 320 | 328 | 336 | 344 | 352 | 360 | 368 | 376 |
| G1  | G2  | G3  | G4  | G5  | G6  | G7  | G8  | G9  | G10 | G11 | G12 |
| 289 | 297 | 305 | 313 | 321 | 329 | 337 | 345 | 353 | 361 | 369 |     |
| H1  | H2  | H3  | H4  | H5  | H6  | H7  | H8  | H9  | H10 | H11 | H12 |
| 290 | 298 | 306 | 314 | 322 | 330 | 338 | 346 | 354 | 362 | 370 |     |

283 : orflpp-847 : IKGLNNLNRGMVLG**S315** : orflpp-879 : LQSADAQSFLNRVCG**347** : orflpp-911 : KKDWDYDFVENPDILR  
 284 : orflpp-848 : NLNRGMVLGSLAATV**316** : orflpp-880 : AQSFLNRVCGVSAAR**348** : orflpp-912 : DFVENPDILRVYANL  
 285 : orflpp-849 : MVLGSLAATVRLQAG**317** : orflpp-881 : NRVCGVSAARLTPCG**349** : orflpp-913 : PDILRVYANLGERVR  
 286 : orflpp-850 : LAATVRLQAGNATEV**318** : orflpp-882 : VSAARLTPCGTGTST**350** : orflpp-914 : VYANLGERVRQALLK  
 287 : orflpp-851 : RLQAGNATEVPANST**319** : orflpp-883 : LTPCGTGTSTDVVYR**351** : orflpp-915 : GERVRQALLKTVQFC  
 288 : orflpp-852 : NATEVPANSTVLSFC**320** : orflpp-884 : TGTSTDVVYRAFDI**352** : orflpp-916 : QALLKTVQFCDAMRN  
 289 : orflpp-853 : PANSTVLSFCFAV**321** : orflpp-885 : DVVYRAFDIYNDKVA**353** : orflpp-917 : TVQFCDAMRNAGIVG  
 290 : orflpp-854 : VLSFCFAVDAAKAY**322** : orflpp-886 : AFDIYNDKVAGFAKE**354** : orflpp-918 : DAMRNAGIVGLTLD  
 291 : orflpp-855 : AFAVDAAKAYKDYLA**323** : orflpp-887 : NDKVAGFAKFLKTN**355** : orflpp-919 : AGIVGLTLDNQDLN  
 292 : orflpp-856 : AAKAYKDYLASGGQ**324** : orflpp-888 : GFAKFLKTNCCRFQ**356** : orflpp-920 : VLTLDNQDLNGNWDY  
 293 : orflpp-857 : KDYLASGGQIPITNC**325** : orflpp-889 : LKTNCCRFQEKDEDD**357** : orflpp-921 : NQDLNGNWDYDFGDFI  
 294 : orflpp-858 : SGGQIPITNCVKMLC**326** : orflpp-890 : CRFQEKDEDDNLID**358** : orflpp-922 : GNWDYDFGDFIQTPG  
 295 : orflpp-859 : ITNCVKMLCTHTGT**327** : orflpp-891 : KDEDNLDISYFVV**359** : orflpp-923 : FGDFIQTPPGSGVPV  
 296 : orflpp-860 : KMLCTHTGTGQAITV**328** : orflpp-892 : NLIDSYFVVKRHTF**360** : orflpp-924 : QTTPGSGVPVVDSSY  
 297 : orflpp-861 : HTGTGQAITVTPEAN**329** : orflpp-893 : YFVVKRHTFSNYQ**361** : orflpp-925 : SGVPVVDSSYSLMMP  
 298 : orflpp-862 : QAITVTPEANMQES**330** : orflpp-894 : RHTFSNYQHEETIY**362** : orflpp-926 : VDSYSLMMPILTLT  
 299 : orflpp-863 : TPEANMQESFGGAS**331** : orflpp-895 : NYQHEETIYNLLK**363** : orflpp-927 : SLLMPILTLTRALTA  
 300 : orflpp-864 : MDQESFGGASCCLY**332** : orflpp-896 : ETIYNLLKDCPAVA**364** : orflpp-928 : ILTLTRALTAESHVD  
 301 : orflpp-865 : FGGASCCLYCRCHID**333** : orflpp-897 : LLKDCPAVAKHDF**365** : orflpp-929 : RALTAESHVDTDLTK  
 302 : orflpp-866 : CCLYCRCHIDHPNPK**334** : orflpp-898 : PAVAKHDFFKFRID**366** : orflpp-930 : ESHVDTDLTKPYIKW  
 303 : orflpp-867 : RCHIDHPNPKGFCDI**335** : orflpp-899 : HDFFKFRIDGMVPH**367** : orflpp-931 : TDLTKPYIKWDLKLY  
 304 : orflpp-868 : HPNPKGFCDLKGKY**336** : orflpp-900 : FRIDGMVPHISRQR**368** : orflpp-932 : PYIKWDLKLYDFTEE  
 305 : orflpp-869 : GFCDLKGKYQIPTT**337** : orflpp-901 : DMVPHISRQRLTKY**369** : orflpp-933 : DLLKYDFTEERLKL  
 306 : orflpp-870 : KGYVQIPTTCANDE**338** : orflpp-902 : ISRQRLTKYTMADL**370** : orflpp-934 : DFTEERLKLFDYFK  
 307 : orflpp-871 : QIPTTCANDPVGF**339** : orflpp-903 : LTKYTMADLVYALR**371** : orflpp-935 : RLKLFDRYFKYWDQT  
 308 : orflpp-872 : CANDPVGFTLKN**340** : orflpp-904 : MADLVYALRHFDE**372** : orflpp-936 : DRYFKYWDQTYHPNC  
 309 : orflpp-873 : VGFTLKNVCTVCGM**341** : orflpp-905 : YALRHFDEGNCDTL**373** : orflpp-937 : YWDQTYHPNCVNCLD  
 310 : orflpp-874 : KNTVCTVCGMWKG**342** : orflpp-906 : FDEGNCDTLKELLV**374** : orflpp-938 : YHPNCVNCLDDRCIL  
 311 : orflpp-875 : TVCGMWKYGCS**343** : orflpp-907 : CDTLKEILVYTNCCI**375** : orflpp-939 : VNCLDDRCILHCANF  
 312 : orflpp-876 : WKGYGCSCDQLREP**344** : orflpp-908 : EILVYTNCCDDDYF**376** : orflpp-940 : DRCILHCANFNVLFS  
 313 : orflpp-877 : CSCDQLREPMLQSA**345** : orflpp-909 : YNCCDDDYFNKKDWY  
 314 : orflpp-878 : LREPMLQSAQA**346** : orflpp-910 : DDYFNKKDWYDFVEN

RACK LAYOUT FOR SYNTHESIS :

**31752 : Rack E**

DESCRIPTION : 564 peptides based on sequences provided.

COMMENTS: Peptides despatched dried down.  
All controls have been removed for QC testing.

| A1  | A2  | A3  | A4  | A5  | A6  | A7  | A8  | A9  | A10 | A11 | A12 |
|-----|-----|-----|-----|-----|-----|-----|-----|-----|-----|-----|-----|
| 377 | 385 | 393 | 401 | 409 | 417 | 425 | 433 | 441 | 449 | 457 | 465 |
| B1  | B2  | B3  | B4  | B5  | B6  | B7  | B8  | B9  | B10 | B11 | B12 |
| 378 | 386 | 394 | 402 | 410 | 418 | 426 | 434 | 442 | 450 | 458 | 466 |
| C1  | C2  | C3  | C4  | C5  | C6  | C7  | C8  | C9  | C10 | C11 | C12 |
| 379 | 387 | 395 | 403 | 411 | 419 | 427 | 435 | 443 | 451 | 459 | 467 |
| D1  | D2  | D3  | D4  | D5  | D6  | D7  | D8  | D9  | D10 | D11 | D12 |
| 380 | 388 | 396 | 404 | 412 | 420 | 428 | 436 | 444 | 452 | 460 | 468 |
| E1  | E2  | E3  | E4  | E5  | E6  | E7  | E8  | E9  | E10 | E11 | E12 |
| 381 | 389 | 397 | 405 | 413 | 421 | 429 | 437 | 445 | 453 | 461 | 469 |
| F1  | F2  | F3  | F4  | F5  | F6  | F7  | F8  | F9  | F10 | F11 | F12 |
| 382 | 390 | 398 | 406 | 414 | 422 | 430 | 438 | 446 | 454 | 462 | 470 |
| G1  | G2  | G3  | G4  | G5  | G6  | G7  | G8  | G9  | G10 | G11 | G12 |
| 383 | 391 | 399 | 407 | 415 | 423 | 431 | 439 | 447 | 455 | 463 |     |
| H1  | H2  | H3  | H4  | H5  | H6  | H7  | H8  | H9  | H10 | H11 | H12 |
| 384 | 392 | 400 | 408 | 416 | 424 | 432 | 440 | 448 | 456 | 464 |     |

377 : orflpp-941 : HCANFNVLSTVFPP409 : orflpp-973 : LLFVVEVVDKYFDCY441 : orflpp-1005 : MLRIMASLVLARKHT  
 378 : orflpp-942 : NVLFSTVFPPTSFGE410 : orflpp-974 : EVVDKYFDCYDGGC442 : orflpp-1006 : ASLVLARKHTTCCSL  
 379 : orflpp-943 : TVFPPTSFGPLVRKI411 : orflpp-975 : YFDCYDGGCINANQV443 : orflpp-1007 : ARKHTTCCSLSHRFY  
 380 : orflpp-944 : TSFGPLVRKIFVDGV412 : orflpp-976 : DGGCINANQVIVNNI444 : orflpp-1008 : TCCSLSHRFYRLANE  
 381 : orflpp-945 : LVRKIFVDGVPFV413 : orflpp-977 : NANQVIVNNLDKSAG445 : orflpp-1009 : SHRFYRLANECAQVL  
 382 : orflpp-946 : FVDGVPFVSTGYH414 : orflpp-978 : IVNNLDKSAGFPFNK446 : orflpp-1010 : RLANECAQVLSEVMVM  
 383 : orflpp-947 : PFVSTGYHFRELGV415 : orflpp-979 : DKSAGFPFNKWGKAP447 : orflpp-1011 : CAQVLSEVMVMCGGSL  
 384 : orflpp-948 : TGYHFRELGVVHNQD416 : orflpp-980 : FPFNKWKGARLYYDS448 : orflpp-1012 : SEMVMCGGSLYVKPG  
 385 : orflpp-949 : RELGVVHNQDVNLH417 : orflpp-981 : WKGARLYYDSMSYED449 : orflpp-1013 : CGGSLYVKPGGTSSG  
 386 : orflpp-950 : VHNQDVNLHSSRSL418 : orflpp-982 : LYYSMSYEDQDAL450 : orflpp-1014 : YVKPGGTSSGDATTA  
 387 : orflpp-951 : VNLHSSRSLFKELLV419 : orflpp-983 : MSYEDQDALFAYTKR451 : orflpp-1015 : GTSSGDATTAYANSV  
 388 : orflpp-952 : SLSFKELLVYAAD420 : orflpp-984 : QDALFAYTKRNVIP452 : orflpp-1016 : DATTAYANSVFNICQ  
 389 : orflpp-953 : KELLVYAADPAMHA421 : orflpp-985 : AYTKRNVIPITIQMN453 : orflpp-1017 : YANSVFNICQAVTAN  
 390 : orflpp-954 : YAADPAMHAASGNLI422 : orflpp-986 : NVIPTITQMNLYK454 : orflpp-1018 : FNICQAVTANVNALL  
 391 : orflpp-955 : AMHAASGNLLLDKR423 : orflpp-987 : ITQMNLYKIASAKNR455 : orflpp-1019 : AVTANVNALLSTDGN  
 392 : orflpp-956 : SGNLLDKRITCFVS424 : orflpp-988 : LKYIASAKNRARTVA456 : orflpp-1020 : VNALLSTDGNKIADK  
 393 : orflpp-957 : LDKRITCFVSVAAL425 : orflpp-989 : SAKNRARTVAGVSI457 : orflpp-1021 : STDGNKIADKYVRNL  
 394 : orflpp-958 : TCFVSVAALTNVAF426 : orflpp-990 : ARTVAGVSICTMTM458 : orflpp-1022 : KIADKYVRNLQHRLY  
 395 : orflpp-959 : AALTNVAFQTVKPG427 : orflpp-991 : GVSICSTMTNRQFH459 : orflpp-1023 : YVRNLQHRLYECLYR  
 396 : orflpp-960 : NVAFQTVKPGNFNK428 : orflpp-992 : STMTNRQFHQKLLK460 : orflpp-1024 : QHRLYECLYRNRDVD  
 397 : orflpp-961 : TVKPGNFNKDFYDF429 : orflpp-993 : RQFHQKLLKSIAT461 : orflpp-1025 : ECLYRNRDVTDFVN  
 398 : orflpp-962 : NFNKDFYDFAVSKGE430 : orflpp-994 : KLLKSIATRGATV462 : orflpp-1026 : NRDVTDFVNEFYAY  
 399 : orflpp-963 : YDFYDFAVSKGFFKE431 : orflpp-995 : IATRGATVIGTSK463 : orflpp-1027 : TDFVNEFYAYLRKH  
 400 : orflpp-964 : VSKGFFKEGSSVELK432 : orflpp-996 : GATVIGTSKFGGWL464 : orflpp-1028 : EFYAYLRKHFSMMIL  
 401 : orflpp-965 : FKEGSSVELKHFFF433 : orflpp-997 : IGTSKFGGWHNMLK465 : orflpp-1029 : LRKHFSMMILSDDAV  
 402 : orflpp-966 : SVELKHFFFAQDGN434 : orflpp-998 : FYGGWHNMLKTVYS466 : orflpp-1030 : SMMILSDDAVVCFNS  
 403 : orflpp-967 : HFFFAQDGNAAISD435 : orflpp-999 : HNMLKTVYSDVENPH467 : orflpp-1031 : SDDAVVCFNSTYASQ  
 404 : orflpp-968 : QDGNAAISDYDYR436 : orflpp-1000 : TVYSDVENPHLMGW468 : orflpp-1032 : VCFNSTYASQGLVAS  
 405 : orflpp-969 : AISDYDYRYRNLPT437 : orflpp-1001 : VENPHLMGWYPKCD469 : orflpp-1033 : TYASQGLVASIKNFK  
 406 : orflpp-970 : DYYRYRNLPTMCDIR438 : orflpp-1002 : LMGWDYPKCDRAMP470 : orflpp-1034 : GLVASIKNFKSVLYY  
 407 : orflpp-971 : NLPTMCDIRQLLFV439 : orflpp-1003 : YPKCDRAMPNMLRIM  
 408 : orflpp-972 : CDIRQLLFVVEVVD440 : orflpp-1004 : RAMPNMLRIMASLVL

RACK LAYOUT FOR SYNTHESIS :

**31752 : Rack F**

DESCRIPTION : 564 peptides based on sequences provided.

COMMENTS: Peptides despatched dried down.  
All controls have been removed for QC testing.

| A1  | A2  | A3  | A4  | A5  | A6  | A7  | A8  | A9  | A10 | A11 | A12 |
|-----|-----|-----|-----|-----|-----|-----|-----|-----|-----|-----|-----|
| 471 | 479 | 487 | 495 | 503 | 511 | 519 | 527 | 535 | 543 | 551 | 559 |
| B1  | B2  | B3  | B4  | B5  | B6  | B7  | B8  | B9  | B10 | B11 | B12 |
| 472 | 480 | 488 | 496 | 504 | 512 | 520 | 528 | 536 | 544 | 552 | 560 |
| C1  | C2  | C3  | C4  | C5  | C6  | C7  | C8  | C9  | C10 | C11 | C12 |
| 473 | 481 | 489 | 497 | 505 | 513 | 521 | 529 | 537 | 545 | 553 | 561 |
| D1  | D2  | D3  | D4  | D5  | D6  | D7  | D8  | D9  | D10 | D11 | D12 |
| 474 | 482 | 490 | 498 | 506 | 514 | 522 | 530 | 538 | 546 | 554 | 562 |
| E1  | E2  | E3  | E4  | E5  | E6  | E7  | E8  | E9  | E10 | E11 | E12 |
| 475 | 483 | 491 | 499 | 507 | 515 | 523 | 531 | 539 | 547 | 555 | 563 |
| F1  | F2  | F3  | F4  | F5  | F6  | F7  | F8  | F9  | F10 | F11 | F12 |
| 476 | 484 | 492 | 500 | 508 | 516 | 524 | 532 | 540 | 548 | 556 | 564 |
| G1  | G2  | G3  | G4  | G5  | G6  | G7  | G8  | G9  | G10 | G11 | G12 |
| 477 | 485 | 493 | 501 | 509 | 517 | 525 | 533 | 541 | 549 | 557 |     |
| H1  | H2  | H3  | H4  | H5  | H6  | H7  | H8  | H9  | H10 | H11 | H12 |
| 478 | 486 | 494 | 502 | 510 | 518 | 526 | 534 | 542 | 550 | 558 |     |

471 : orflpp-1035 : IKNFKSVLYYQNNV  
 472 : orflpp-1036 : SVLYYQNNVMSEAK  
 473 : orflpp-1037 : QNNVMSEAKCWTE  
 474 : orflpp-1038 : MSEAKCWTEETDLTK  
 475 : orflpp-1039 : CWTETDLTKGPHEFC  
 476 : orflpp-1040 : DLTKGPHEFCSQHT  
 477 : orflpp-1041 : PHEFCSQHTMLVKQ  
 478 : orflpp-1042 : SQHTMLVKQGGDYV  
 479 : orflpp-1043 : LVKQGGDYVYLPYP  
 480 : orflpp-1044 : DDYVYLPYDPSRII  
 481 : orflpp-1045 : LPYDPSRILGAGCE  
 482 : orflpp-1046 : PSRILGAGCFVDDI  
 483 : orflpp-1047 : GAGCFVDDIVKTDG  
 484 : orflpp-1048 : VDDIVKTDGTLMI  
 485 : orflpp-1049 : KTDGTLMIERFVSL  
 486 : orflpp-1050 : LMIERFVSLAIDAY  
 487 : orflpp-1051 : FVSLAIDAYPLTKH  
 488 : orflpp-1052 : IDAYPLTKHPNQEY  
 489 : orflpp-1053 : LTKHPNQEYADVFI  
 490 : orflpp-1054 : NQEYADVFLYLQY  
 491 : orflpp-1055 : DVFHLYLQYIRKHL  
 492 : orflpp-1056 : YLQYIRKHLDELTH  
 493 : orflpp-1057 : RKLHDELTHGMLDM  
 494 : orflpp-1058 : EKLHMLDMYSVML  
 495 : orflpp-1059 : MLDMYSVMLTNDNT  
 496 : orflpp-1060 : SVMLTNDNTSRYWE  
 497 : orflpp-1061 : NDNTSRYWEPEFYEA  
 498 : orflpp-1062 : RYWEPEFYEAMYPH  
 499 : orflpp-1063 : EFYEAMYPHTVQLQ  
 500 : orflpp-1064 : MYTPHTVQLQAVGAC  
 501 : orflpp-1065 : TVLQAVGACVLCNS  
 502 : orflpp-1066 : VGACVLCNSQTSLR  
 503 : orflpp-1067 : LCNSQTSLRGACIR  
 504 : orflpp-1068 : TSLRCGACIRPFLC  
 505 : orflpp-1069 : GACIRPFLCCKCCY  
 506 : orflpp-1070 : RPFLCCKCCYDHVI  
 507 : orflpp-1071 : CKCCYDHVISTSHKI  
 508 : orflpp-1072 : DHVISTSHKLVLSV  
 509 : orflpp-1073 : TSHKLVLSVNPYVCM  
 510 : orflpp-1074 : VLSVNPYVCNAPGCI  
 511 : orflpp-1075 : PYVCNAPGCDVTDV  
 512 : orflpp-1076 : APGCDVTDVTQLYL  
 513 : orflpp-1077 : VTDVTQLYLGGMSY  
 514 : orflpp-1078 : QLYLGGMSYCKSHK  
 515 : orflpp-1079 : GMSYCKSHKPPIS  
 516 : orflpp-1080 : CKSHKPPISFPLCAN  
 517 : orflpp-1081 : PPISFPLCANGQVFG  
 518 : orflpp-1082 : PLCANGQVFLYKLN  
 519 : orflpp-1083 : GQVFLYKNTCVGSI  
 520 : orflpp-1084 : LYKNTCVGSDNVTDF  
 521 : orflpp-1085 : CVGSDNVTDFNAIAT  
 522 : orflpp-1086 : NVTDFNAIATCDWT  
 523 : orflpp-1087 : NAIATCDWTNAGDY  
 524 : orflpp-1088 : CDWTNAGDYILANT  
 525 : orflpp-1089 : AGDYILANTCTERLK  
 526 : orflpp-1090 : LANTCTERLKLFAAE  
 527 : orflpp-1091 : TERLKLFAAETLKAT  
 528 : orflpp-1092 : LFAAETLKATEETFK  
 529 : orflpp-1093 : TLKATEETFKLSYGI  
 530 : orflpp-1094 : EETFKLSYGIATVRE  
 531 : orflpp-1095 : LSYGIATVREVLSDR  
 532 : orflpp-1096 : ATVREVLSDRELHL  
 533 : orflpp-1097 : VLSDRELHLSWEVKG  
 534 : orflpp-1098 : ELHLSWEVKGPRPPL  
 535 : orflpp-1099 : WEVKGPRPPLNRNY  
 536 : orflpp-1100 : PRPPLNRNYVFTGY  
 537 : orflpp-1101 : NRNYVFTGYRVTKNS  
 538 : orflpp-1102 : FTGYRVTKNSKVQIG  
 539 : orflpp-1103 : VTKNSKVQIGEYTFE  
 540 : orflpp-1104 : KVQIGEYTFEKGDY  
 541 : orflpp-1105 : EYTFEKGDYGDVAVV  
 542 : orflpp-1106 : KGDYGDVAVVGRGTT  
 543 : orflpp-1107 : DAVVYRGTTTTYKLN  
 544 : orflpp-1108 : RGTTTYKLVNGDYFV  
 545 : orflpp-1109 : YKLVNGDYFVLTSHT  
 546 : orflpp-1110 : GDYFVLTSHTVMPLS  
 547 : orflpp-1111 : LTSHTVMPLSAPTLV  
 548 : orflpp-1112 : VMPLSAPTLVQEHY  
 549 : orflpp-1113 : APTLVQEHYVRITG  
 550 : orflpp-1114 : QEHYVRITGLYPTL  
 551 : orflpp-1115 : VRITGLYPTLNISDE  
 552 : orflpp-1116 : LYPTLNISDEFSSNV  
 553 : orflpp-1117 : NISDEFSSNVANYQK  
 554 : orflpp-1118 : FSSNVANYQKVGMMQ  
 555 : orflpp-1119 : ANYQKVGMMQYSTLQ  
 556 : orflpp-1120 : VGMQYSTLQGGPPGT  
 557 : orflpp-1121 : YSTLQGGPPGTGKSH  
 558 : orflpp-1122 : GPPGTGKSHFAIGLA  
 559 : orflpp-1123 : GKSHFAIGLALYYPS  
 560 : orflpp-1124 : AIGLALYYPSARIVY  
 561 : orflpp-1125 : LYYPSARIVYTACSH  
 562 : orflpp-1126 : ARIVYTACSHAAVDA  
 563 : orflpp-1127 : TACSHAAVDALCEKA  
 564 : orflpp-1128 : AAVDALCEKALKYLP

RACK LAYOUT FOR SYNTHESIS :

**31753 : Rack A**

DESCRIPTION : 564 peptides based on sequences provided.

COMMENTS: Peptides despatched dried down.  
All controls have been removed for QC testing.

|    |    |    |    |    |    |    |    |    |     |     |     |
|----|----|----|----|----|----|----|----|----|-----|-----|-----|
| A1 | A2 | A3 | A4 | A5 | A6 | A7 | A8 | A9 | A10 | A11 | A12 |
| 1  | 9  | 17 | 25 | 33 | 41 | 49 | 57 | 65 | 73  | 81  | 89  |
| B1 | B2 | B3 | B4 | B5 | B6 | B7 | B8 | B9 | B10 | B11 | B12 |
| 2  | 10 | 18 | 26 | 34 | 42 | 50 | 58 | 66 | 74  | 82  | 90  |
| C1 | C2 | C3 | C4 | C5 | C6 | C7 | C8 | C9 | C10 | C11 | C12 |
| 3  | 11 | 19 | 27 | 35 | 43 | 51 | 59 | 67 | 75  | 83  | 91  |
| D1 | D2 | D3 | D4 | D5 | D6 | D7 | D8 | D9 | D10 | D11 | D12 |
| 4  | 12 | 20 | 28 | 36 | 44 | 52 | 60 | 68 | 76  | 84  | 92  |
| E1 | E2 | E3 | E4 | E5 | E6 | E7 | E8 | E9 | E10 | E11 | E12 |
| 5  | 13 | 21 | 29 | 37 | 45 | 53 | 61 | 69 | 77  | 85  | 93  |
| F1 | F2 | F3 | F4 | F5 | F6 | F7 | F8 | F9 | F10 | F11 | F12 |
| 6  | 14 | 22 | 30 | 38 | 46 | 54 | 62 | 70 | 78  | 86  | 94  |
| G1 | G2 | G3 | G4 | G5 | G6 | G7 | G8 | G9 | G10 | G11 | G12 |
| 7  | 15 | 23 | 31 | 39 | 47 | 55 | 63 | 71 | 79  | 87  |     |
| H1 | H2 | H3 | H4 | H5 | H6 | H7 | H8 | H9 | H10 | H11 | H12 |
| 8  | 16 | 24 | 32 | 40 | 48 | 56 | 64 | 72 | 80  | 88  |     |

- 1 : orflpp-1129 : LCEKALKYLPIDKCS 33 : orflpp-1161 : KGVITHDVSSAINRP 65 : orflpp-1193 : EGLCVDIPGIPKDMT  
 2 : orflpp-1130 : LKYLPIIDKCSRIIPA 34 : orflpp-1162 : HDVSSAINRPQIGVV 66 : orflpp-1194 : DIPGIPKDMTYRRLI  
 3 : orflpp-1131 : IDKCSRIIPARARVE 35 : orflpp-1163 : AINRPQIGVVREFLT 67 : orflpp-1195 : PKDMTYRRLISMGGF  
 4 : orflpp-1132 : RIIPARARVECFDKF 36 : orflpp-1164 : QIGVVREFLTRNPAW 68 : orflpp-1196 : YRRLISMGGFKMNYQ  
 5 : orflpp-1133 : RARVECFDKFKVNST 37 : orflpp-1165 : REFLTRNPAWRKAVF 69 : orflpp-1197 : SMMGGFKMNYQVNGYP  
 6 : orflpp-1134 : CFDKFKVNSTLEQYV 38 : orflpp-1166 : RNPWRKAVFISPYN 70 : orflpp-1198 : KMNYQVNGYPNMFIT  
 7 : orflpp-1135 : KVNSTLEQYVFCTVN 39 : orflpp-1167 : RKAVFISPYNSQNAV 71 : orflpp-1199 : VNGYPNMFITREEAI  
 8 : orflpp-1136 : LEQYVFCTVNALPET 40 : orflpp-1168 : ISPYNSQNAVASKIL 72 : orflpp-1200 : NMFITREEAIRHVRA  
 9 : orflpp-1137 : FCTVNALPETTADIV 41 : orflpp-1169 : SQNAVASKILGLPTQ 73 : orflpp-1201 : REEAIHVRAWIGFD  
 10 : orflpp-1138 : ALPETTADIVVFDEI 42 : orflpp-1170 : ASKILGLPTQTVDS 74 : orflpp-1202 : RHVRAWIGFDVEGCH  
 11 : orflpp-1139 : TADIVVFDEISMATN 43 : orflpp-1171 : GLPTQTVDSQSEY 75 : orflpp-1203 : WIGFDVEGCHATREA  
 12 : orflpp-1140 : VFDEISMATNYDLSV 44 : orflpp-1172 : TVDSQSEYDYVIF 76 : orflpp-1204 : VEGCHATREAVGTNL  
 13 : orflpp-1141 : SMATNYDLSVVNARL 45 : orflpp-1173 : QGSEYDYVIFTQTTE 77 : orflpp-1205 : ATREAVGTNLPLQLG  
 14 : orflpp-1142 : YDLSVVNARLRKHY 46 : orflpp-1174 : DYVIFTQTTEAHSC 78 : orflpp-1206 : VGTNLPLQLGFSTGV  
 15 : orflpp-1143 : VNARLRKHYVYIGD 47 : orflpp-1175 : TQTTETAHSCNVNR 79 : orflpp-1207 : PLQLGFSTGVNLVAV  
 16 : orflpp-1144 : RAKHYVYIGDPAQLP 48 : orflpp-1176 : TAHSCNVNRNVAIT 80 : orflpp-1208 : FSTGVNLVAVPTGYV  
 17 : orflpp-1145 : VYIGDPAQLPAPRTL 49 : orflpp-1177 : NVNRFNVAITRAKVG 81 : orflpp-1209 : NLVAVPTGYVDTPNN  
 18 : orflpp-1146 : PAQLPAPRTLTKGT 50 : orflpp-1178 : NVAITRAKVGILCIM 82 : orflpp-1210 : PTGYVDTPNNTDFSR  
 19 : orflpp-1147 : APRTLTKGTLEPEY 51 : orflpp-1179 : RAKVGILCIMSDDL 83 : orflpp-1211 : DTPNNTDFSRVSAKP  
 20 : orflpp-1148 : LTKGTLEPEYFNSVC 52 : orflpp-1180 : ILCIMSDDLKLDKQ 84 : orflpp-1212 : TDFSRVSAKPPPGDQ  
 21 : orflpp-1149 : LEPEYFNSVCRLMKT 53 : orflpp-1181 : SDDLKLDKQFTSLE 85 : orflpp-1213 : VSAKPPPGDQFKHLI  
 22 : orflpp-1150 : FNSVCRLMKTIGPDM 54 : orflpp-1182 : YDKLQFTSLEIPRN 86 : orflpp-1214 : PPGDQFKHLIPLMYK  
 23 : orflpp-1151 : RLMKTIGPDMFLGTC 55 : orflpp-1183 : FTSLEIPRNVAITLQ 87 : orflpp-1215 : FKHLIPLMYKGLPWN  
 24 : orflpp-1152 : IGPDMFLGTCRRCPA 56 : orflpp-1184 : IPRNVAITLQENVT 88 : orflpp-1216 : PLMYKGLPWNVVRK  
 25 : orflpp-1153 : FLGTCRRCPAEIVDT 57 : orflpp-1185 : VATLQENVTGLFKD 89 : orflpp-1217 : GLPWNVVRKIVQML  
 26 : orflpp-1154 : RRCPAEIVDTVSALV 58 : orflpp-1186 : AENVTGLFKDCSKVI 90 : orflpp-1218 : VVRKIVQMLSDTLK  
 27 : orflpp-1155 : EIVDTVSALVYDNKL 59 : orflpp-1187 : GLFKDCSKVITGLHP 91 : orflpp-1219 : IVQMLSDTLKNLSDR  
 28 : orflpp-1156 : VSALVYDNKLKAHKD 60 : orflpp-1188 : CSKVITGLHPTQAPT 92 : orflpp-1220 : SDTLKNLSDRVVFVL  
 29 : orflpp-1157 : YDNKLKAHKDKSAQC 61 : orflpp-1189 : TGLHPTQAPTHLSVD 93 : orflpp-1221 : NLSDRVVFVLWAHGF  
 30 : orflpp-1158 : KAHKDKSAQCFKMFY 62 : orflpp-1190 : TQAPTHLSVDTKFKT 94 : orflpp-1222 : VVFVLWAHGFELTSM  
 31 : orflpp-1159 : KSAQCFKMFYKGVIT 63 : orflpp-1191 : HLSVDTKFKTEGLCV  
 32 : orflpp-1160 : FKMFYKGVITHDVSS 64 : orflpp-1192 : TKFKTEGLCVDIPGI

RACK LAYOUT FOR SYNTHESIS :

**31753 : Rack B**

DESCRIPTION : 564 peptides based on sequences provided.

COMMENTS: Peptides despatched dried down.  
All controls have been removed for QC testing.

|     |     |     |     |     |     |     |     |     |     |     |     |
|-----|-----|-----|-----|-----|-----|-----|-----|-----|-----|-----|-----|
| A1  | A2  | A3  | A4  | A5  | A6  | A7  | A8  | A9  | A10 | A11 | A12 |
| 95  | 103 | 111 | 119 | 127 | 135 | 143 | 151 | 159 | 167 | 175 | 183 |
| B1  | B2  | B3  | B4  | B5  | B6  | B7  | B8  | B9  | B10 | B11 | B12 |
| 96  | 104 | 112 | 120 | 128 | 136 | 144 | 152 | 160 | 168 | 176 | 184 |
| C1  | C2  | C3  | C4  | C5  | C6  | C7  | C8  | C9  | C10 | C11 | C12 |
| 97  | 105 | 113 | 121 | 129 | 137 | 145 | 153 | 161 | 169 | 177 | 185 |
| D1  | D2  | D3  | D4  | D5  | D6  | D7  | D8  | D9  | D10 | D11 | D12 |
| 98  | 106 | 114 | 122 | 130 | 138 | 146 | 154 | 162 | 170 | 178 | 186 |
| E1  | E2  | E3  | E4  | E5  | E6  | E7  | E8  | E9  | E10 | E11 | E12 |
| 99  | 107 | 115 | 123 | 131 | 139 | 147 | 155 | 163 | 171 | 179 | 187 |
| F1  | F2  | F3  | F4  | F5  | F6  | F7  | F8  | F9  | F10 | F11 | F12 |
| 100 | 108 | 116 | 124 | 132 | 140 | 148 | 156 | 164 | 172 | 180 | 188 |
| G1  | G2  | G3  | G4  | G5  | G6  | G7  | G8  | G9  | G10 | G11 | G12 |
| 101 | 109 | 117 | 125 | 133 | 141 | 149 | 157 | 165 | 173 | 181 |     |
| H1  | H2  | H3  | H4  | H5  | H6  | H7  | H8  | H9  | H10 | H11 | H12 |
| 102 | 110 | 118 | 126 | 134 | 142 | 150 | 158 | 166 | 174 | 182 |     |

- 95 : orflpp-1223 : WAHGFELTSMKYFVK127 : orflpp-1255 : VEWKFYDAQPCSDKA159 : orflpp-1287 : FSLWVYKQFDTYNLW
- 96 : orflpp-1224 : ELTSMKYFVKIGPER128 : orflpp-1256 : YDAQPCSDKAYKIEE160 : orflpp-1288 : YKQFDTYNLWNTFTR
- 97 : orflpp-1225 : KYFVKIGPERTCCLC129 : orflpp-1257 : CSDKAYKIEELFYSY161 : orflpp-1289 : TYNLWNTFTRLQSL
- 98 : orflpp-1226 : IGPERTCCLDRRAT130 : orflpp-1258 : YKIEELFYSYATHSD162 : orflpp-1290 : NTFTRLQSLNVAFN
- 99 : orflpp-1227 : TCCLCDRRATCFSTAM131 : orflpp-1259 : LFYSYATHSDKFTDG163 : orflpp-1291 : LQSLNVAFNVVNKG
- 100 : orflpp-1228 : DRRATCFSTASDTYAM132 : orflpp-1260 : ATHSDKFTDGVCLFW164 : orflpp-1292 : NVAFNVVNKGHFDGQ
- 101 : orflpp-1229 : CFSTASDTYACWHHS133 : orflpp-1261 : KFTDGVCLFWNCNVD165 : orflpp-1293 : VVNKGHFDGQQGEVP
- 102 : orflpp-1230 : SDTYACWHHSIGFDY134 : orflpp-1262 : VCLFWNCNVDRYPAM166 : orflpp-1294 : HFDGQQGEVPSIIN
- 103 : orflpp-1231 : CWHHSIGFDYVYNPF135 : orflpp-1263 : NCNVDRYPANSIVCR167 : orflpp-1295 : QGEVPSIINNTVYT
- 104 : orflpp-1232 : IGFDYVYNPFMIDVQ136 : orflpp-1264 : RYPANSIVCRFDTRV168 : orflpp-1296 : VSIINNTVYTKVDGV
- 105 : orflpp-1233 : VYNPFMIDVQQWGFT137 : orflpp-1265 : SIVCRFDTRVLSNLM169 : orflpp-1297 : NTVYTKVDGVDVLEL
- 106 : orflpp-1234 : MIDVQQWGFTGNLQS138 : orflpp-1266 : FDTRVLSNLNLPGCD170 : orflpp-1298 : KVDGVDVLELFENKTT
- 107 : orflpp-1235 : QWGFTGNLQSNHDLY139 : orflpp-1267 : LSNLNLPGCDGGSLY171 : orflpp-1299 : DVLELFENKTTLPVNV
- 108 : orflpp-1236 : GNLQSNHDLYCQVHG140 : orflpp-1268 : LPGCDGGSLYVNKHA172 : orflpp-1300 : ENKTTLPVNVAFELW
- 109 : orflpp-1237 : NHDLYCQVHGNAHVA141 : orflpp-1269 : GGSLYVNKHAFHTPA173 : orflpp-1301 : LPVNVAFELWAKRNI
- 110 : orflpp-1238 : CQVHGNAHVASCDAI142 : orflpp-1270 : VNKHAFHTPAFDKSA174 : orflpp-1302 : AFELWAKRNIKPVE
- 111 : orflpp-1239 : NAHVASCDAIMTRCL143 : orflpp-1271 : FHTPAFDKSAFVNLK175 : orflpp-1303 : AKRNIKPVEVKILN
- 112 : orflpp-1240 : SCDAIMTRCLAVHEC144 : orflpp-1272 : FDKSAFVNLKQLPFF176 : orflpp-1304 : KPVPEVKILNNLGVD
- 113 : orflpp-1241 : MTRCLAVHECFVKRV145 : orflpp-1273 : FVNLKQLPFFYYSDS177 : orflpp-1305 : VKILNNLGVDIAANT
- 114 : orflpp-1242 : AVHECFVKRVDWTEIE146 : orflpp-1274 : QLPFFYYSDSPCESH178 : orflpp-1306 : NLGVDIAANTVIWDY
- 115 : orflpp-1243 : FVKRVDWTEIYPIIG147 : orflpp-1275 : YYSDSPCESHGKQVV179 : orflpp-1307 : IAANTVIWDYKRDA
- 116 : orflpp-1244 : DWTEIYPIIGDELKI148 : orflpp-1276 : PCESHGKQVVSIDIDY180 : orflpp-1308 : VIWDYKRDAPIHIST
- 117 : orflpp-1245 : YPIIGDELKINAACR149 : orflpp-1277 : GKQVVSIDIDYVPLKS181 : orflpp-1309 : KRDAPIHISTIGVCS
- 118 : orflpp-1246 : DELKINAACRKHVQHM150 : orflpp-1278 : SDIDYVPLKSATCIT182 : orflpp-1310 : AHISTIGVCSMTDIA
- 119 : orflpp-1247 : NAACRKHVQHMVVKAM151 : orflpp-1279 : VPLKSATCITRCNLG183 : orflpp-1311 : IGVCSMTDIAKKPTE
- 120 : orflpp-1248 : KVQHMVVKAAALLADK152 : orflpp-1280 : ATCITRCNLGGAVCR184 : orflpp-1312 : MTDIAKKPTETICAP
- 121 : orflpp-1249 : VVKAALLADKFPVLH153 : orflpp-1281 : RCNLGGAVCRHHANE185 : orflpp-1313 : KKPTETICAPLTVFF
- 122 : orflpp-1250 : LLADKFPVLHDIGNP154 : orflpp-1282 : GAVCRHHANEYRLYL186 : orflpp-1314 : TICAPLTVFFDGRVD
- 123 : orflpp-1251 : FPVLHDIGNPKAIKC155 : orflpp-1283 : HHANEYRLYLDAYNM187 : orflpp-1315 : LTVFFDGRVDGQVDL
- 124 : orflpp-1252 : DIGNPKAIKCVPAD156 : orflpp-1284 : YRLYLDAYNMMISAG188 : orflpp-1316 : DGRVDGQVDFLRNAR
- 125 : orflpp-1253 : KAIKCVPADVEWKF157 : orflpp-1285 : DAYNMMISAGFSLWV
- 126 : orflpp-1254 : VPQADVEWKFYDAQP158 : orflpp-1286 : MISAGFSLWVYKQFD

RACK LAYOUT FOR SYNTHESIS :

**31753 : Rack C**

DESCRIPTION : 564 peptides based on sequences provided.

COMMENTS: Peptides despatched dried down.  
All controls have been removed for QC testing.

| A1  | A2  | A3  | A4  | A5  | A6  | A7  | A8  | A9  | A10 | A11 | A12 |
|-----|-----|-----|-----|-----|-----|-----|-----|-----|-----|-----|-----|
| 189 | 197 | 205 | 213 | 221 | 229 | 237 | 245 | 253 | 261 | 269 | 277 |
| B1  | B2  | B3  | B4  | B5  | B6  | B7  | B8  | B9  | B10 | B11 | B12 |
| 190 | 198 | 206 | 214 | 222 | 230 | 238 | 246 | 254 | 262 | 270 | 278 |
| C1  | C2  | C3  | C4  | C5  | C6  | C7  | C8  | C9  | C10 | C11 | C12 |
| 191 | 199 | 207 | 215 | 223 | 231 | 239 | 247 | 255 | 263 | 271 | 279 |
| D1  | D2  | D3  | D4  | D5  | D6  | D7  | D8  | D9  | D10 | D11 | D12 |
| 192 | 200 | 208 | 216 | 224 | 232 | 240 | 248 | 256 | 264 | 272 | 280 |
| E1  | E2  | E3  | E4  | E5  | E6  | E7  | E8  | E9  | E10 | E11 | E12 |
| 193 | 201 | 209 | 217 | 225 | 233 | 241 | 249 | 257 | 265 | 273 | 281 |
| F1  | F2  | F3  | F4  | F5  | F6  | F7  | F8  | F9  | F10 | F11 | F12 |
| 194 | 202 | 210 | 218 | 226 | 234 | 242 | 250 | 258 | 266 | 274 | 282 |
| G1  | G2  | G3  | G4  | G5  | G6  | G7  | G8  | G9  | G10 | G11 | G12 |
| 195 | 203 | 211 | 219 | 227 | 235 | 243 | 251 | 259 | 267 | 275 |     |
| H1  | H2  | H3  | H4  | H5  | H6  | H7  | H8  | H9  | H10 | H11 | H12 |
| 196 | 204 | 212 | 220 | 228 | 236 | 244 | 252 | 260 | 268 | 276 |     |

189 : orflpp-1317 : GQVDLFRNARNGVLV221 : orflpp-1349 : KCVCSVIDLLDDFV253 : orflpp-1381 : FVSDADSTLIGDCAT  
 190 : orflpp-1318 : FRNARNGVLITEGVS222 : orflpp-1350 : VIDLLDDDFVEIIKS254 : orflpp-1382 : DSTLIGDCATVHTAN  
 191 : orflpp-1319 : NGVLITEGVSVKGLQF223 : orflpp-1351 : LDDFVEIIKSQDLSV255 : orflpp-1383 : GDCATVHTANKWDLI  
 192 : orflpp-1320 : TEGSVKGLQPSVGVK224 : orflpp-1352 : EIIKSQDLSVSVSKV256 : orflpp-1384 : VHTANKWDLIISDMY  
 193 : orflpp-1321 : KGLQPSVGPQASLN225 : orflpp-1353 : QDLSVSVKVVKVTI257 : orflpp-1385 : KWDLIISDMYDPKTK  
 194 : orflpp-1322 : SVGPKQASLVGVTL226 : orflpp-1354 : VSKVVKVTIDYTEIS258 : orflpp-1386 : ISDMYDPKTKNVTKE  
 195 : orflpp-1323 : QASLVGVTLIGEAVK227 : orflpp-1355 : KVTIDYTEISFMLWC259 : orflpp-1387 : DPKTKNVTKENDSKE  
 196 : orflpp-1324 : GVTLIGEAVKTQFN228 : orflpp-1356 : YTEISFMLWCKDGHV260 : orflpp-1388 : NVTKENDSKEGFFI  
 197 : orflpp-1325 : GEAVKTQFNYYKKV229 : orflpp-1357 : FMLWCKDGHVETFY261 : orflpp-1389 : NDSKEGFFTYICGFI  
 198 : orflpp-1326 : TQFNYYKKVDGVVQ230 : orflpp-1358 : KDGHVETFYPKLQSS262 : orflpp-1390 : GFFTYICGFIQOKLA  
 199 : orflpp-1327 : YKKVDGVVQQLPETV231 : orflpp-1359 : ETFYPKLQSSQAWQ263 : orflpp-1391 : ICGFIQOKLALGGSV  
 200 : orflpp-1328 : GVVQQLPETYFTQSF232 : orflpp-1360 : KLQSSQAWQPGVAM264 : orflpp-1392 : QOKLALGGSVAIKIT  
 201 : orflpp-1329 : LPETYFTQSRNLQEF233 : orflpp-1361 : QAWQPGVAMPNLYKM265 : orflpp-1393 : LGGSSVAIKITEHSWN  
 202 : orflpp-1330 : FTQSRNLQEFKPRS234 : orflpp-1362 : GVAMPNLYKMQRMLI266 : orflpp-1394 : AIKITEHSWNADLYK  
 203 : orflpp-1331 : NLQEFKPRSQMEIDE235 : orflpp-1363 : NLYKMQRMLLEKCDI267 : orflpp-1395 : EHSWNADLYKLMGFH  
 204 : orflpp-1332 : KPRSQMEIDFLELAM236 : orflpp-1364 : QRMLLEKCDLQNYGI268 : orflpp-1396 : ADLYKLMGFHAWWTA  
 205 : orflpp-1333 : MEIDFLELAMDEFIE237 : orflpp-1365 : EKCDLQNYGDSATLP269 : orflpp-1397 : LMGFHAWWTAFTNV  
 206 : orflpp-1334 : LELAMDEFIERYKLE238 : orflpp-1366 : QNYGDSATLPKGIMM270 : orflpp-1398 : AWWTAFTNVNASSS  
 207 : orflpp-1335 : DEFIERYKLEGYAFE239 : orflpp-1367 : SATLPKGIMMNVAKY271 : orflpp-1399 : FVTNVNASSSEAFLI  
 208 : orflpp-1336 : RYKLEGYAFEHIVY240 : orflpp-1368 : KGIMMNVAKYQQLCQ272 : orflpp-1400 : NASSSEAFLIGCNYL  
 209 : orflpp-1337 : GYAFEHIVYVGDVSH241 : orflpp-1369 : NVAKYQQLCQYLNTI273 : orflpp-1401 : EAFLIGCNYLKPRE  
 210 : orflpp-1338 : HIVYVGDVSHSLGGI242 : orflpp-1370 : TQLCQYLNTLTLAV274 : orflpp-1402 : GCNLYKPREQIDGY  
 211 : orflpp-1339 : DFSHSLGGIHLHLI243 : orflpp-1371 : YLNTLTLAVPYNMRV275 : orflpp-1403 : GKPREQIDGYVMHAN  
 212 : orflpp-1340 : QLGGIHLHLIGLAKRF244 : orflpp-1372 : TLAVPYNMRVIFHFG276 : orflpp-1404 : QIDGYVMHANYIFWR  
 213 : orflpp-1341 : HLLIHLIHLIHLIHLI245 : orflpp-1373 : YNMRVIFHFGAGSDK277 : orflpp-1405 : VMHANYIFWRNTNPI  
 214 : orflpp-1342 : LAKRFKESPFLEDE246 : orflpp-1374 : IHFGAGSDKGVAPGT278 : orflpp-1406 : YIFWRNTNPIQLSSY  
 215 : orflpp-1343 : KESPFLEDFIPMD247 : orflpp-1375 : GSDKGVAPGTAVLRQ279 : orflpp-1407 : NTNPIQLSSYSLFDM  
 216 : orflpp-1344 : ELEDFIPMDSTVKN248 : orflpp-1376 : VAPGTAVLRQWLPT280 : orflpp-1408 : QLSSYSLFDMSKFPL  
 217 : orflpp-1345 : IPMDSTVKNYFITD249 : orflpp-1377 : AVLRQWLPTGTLV281 : orflpp-1409 : SLFDMSKFPLKLRGT  
 218 : orflpp-1346 : TVKNYFITDAQTGS250 : orflpp-1378 : WLPTGTLVSDSLN282 : orflpp-1410 : SKFPLKLRGTAVMSL  
 219 : orflpp-1347 : FITDAQTGSCKVC251 : orflpp-1379 : TLLVSDSLNDFVSDA  
 220 : orflpp-1348 : QTGSCKVCVIDLI252 : orflpp-1380 : SDLNDFVSDADSTLI

RACK LAYOUT FOR SYNTHESIS :

**31753 : Rack D**

DESCRIPTION : 564 peptides based on sequences provided.

COMMENTS: Peptides despatched dried down.  
All controls have been removed for QC testing.

| A1  | A2  | A3  | A4  | A5  | A6  | A7  | A8  | A9  | A10 | A11 | A12 |
|-----|-----|-----|-----|-----|-----|-----|-----|-----|-----|-----|-----|
| 283 | 291 | 299 | 307 | 315 | 323 | 331 | 339 | 347 | 355 | 363 | 371 |
| B1  | B2  | B3  | B4  | B5  | B6  | B7  | B8  | B9  | B10 | B11 | B12 |
| 284 | 292 | 300 | 308 | 316 | 324 | 332 | 340 | 348 | 356 | 364 | 372 |
| C1  | C2  | C3  | C4  | C5  | C6  | C7  | C8  | C9  | C10 | C11 | C12 |
| 285 | 293 | 301 | 309 | 317 | 325 | 333 | 341 | 349 | 357 | 365 | 373 |
| D1  | D2  | D3  | D4  | D5  | D6  | D7  | D8  | D9  | D10 | D11 | D12 |
| 286 | 294 | 302 | 310 | 318 | 326 | 334 | 342 | 350 | 358 | 366 | 374 |
| E1  | E2  | E3  | E4  | E5  | E6  | E7  | E8  | E9  | E10 | E11 | E12 |
| 287 | 295 | 303 | 311 | 319 | 327 | 335 | 343 | 351 | 359 | 367 | 375 |
| F1  | F2  | F3  | F4  | F5  | F6  | F7  | F8  | F9  | F10 | F11 | F12 |
| 288 | 296 | 304 | 312 | 320 | 328 | 336 | 344 | 352 | 360 | 368 | 376 |
| G1  | G2  | G3  | G4  | G5  | G6  | G7  | G8  | G9  | G10 | G11 | G12 |
| 289 | 297 | 305 | 313 | 321 | 329 | 337 | 345 | 353 | 361 | 369 |     |
| H1  | H2  | H3  | H4  | H5  | H6  | H7  | H8  | H9  | H10 | H11 | H12 |
| 290 | 298 | 306 | 314 | 322 | 330 | 338 | 346 | 354 | 362 | 370 |     |

- |                   |                   |              |                   |              |                     |
|-------------------|-------------------|--------------|-------------------|--------------|---------------------|
| 283 : orflpp-1411 | : KLRGTAVMSLKEGQI | 315 : SGP-25 | : NNATNVVIVKVFCE  | 347 : SGP-57 | : ENGTITDAVDCALDP   |
| 284 : orflpp-1412 | : AVMSLKEGQINDMII | 316 : SGP-26 | : VVIKVFCEQFCNDP  | 348 : SGP-58 | : TDAVDCALDPLSETK   |
| 285 : orflpp-1413 | : KEGQINDMILSLLSK | 317 : SGP-27 | : CEFQFCNDPFLGVY  | 349 : SGP-59 | : CALDPLSETKCTLKS   |
| 286 : orflpp-1414 | : NDMILSLLSKGRLI  | 318 : SGP-28 | : CNDPFLGVYHKNK   | 350 : SGP-60 | : LSETKCTLKSFTVEK   |
| 287 : orflpp-1415 | : SLLSKGRLIIRENN  | 319 : SGP-29 | : LGVYHKNKSWME    | 351 : SGP-61 | : CTLKSFTVEKGIYQT   |
| 288 : orflpp-1416 | : GRLIIRENNRVVIS  | 320 : SGP-30 | : HKNNKSWMESEFRV  | 352 : SGP-62 | : FTVEKGIYQTSNFRV   |
| 289 : orflpp-1417 | : RENNRVVISSDVLV  | 321 : SGP-31 | : SWMESEFRVYSSAN  | 353 : SGP-63 | : GIYQTSNFRVQPTES   |
| 290 : orflpp-1419 | : ENNRVVISSDVLV   | 322 : SGP-32 | : EFRVYSSANNCTFE  | 354 : SGP-64 | : SNFRVQPTESIVRFP   |
| 291 : SGP-1       | : MFVFLVLLPLVSSQ  | 323 : SGP-33 | : SSANNCTFEYVSQP  | 355 : SGP-65 | : QPTESIVRFPNITNL   |
| 292 : SGP-2       | : VLLPLVSSQCVNL   | 324 : SGP-34 | : CTFEYVSQPFLMD   | 356 : SGP-66 | : IVRFPNITNLCPFGE   |
| 293 : SGP-3       | : VSSQCVNLTRTQL   | 325 : SGP-35 | : VSQPFLMDLEKQGN  | 357 : SGP-67 | : NITNLCPFGEVFNAT   |
| 294 : SGP-4       | : VNLTRTQLPPAYTN  | 326 : SGP-36 | : LMDLEKQGNFKNLR  | 358 : SGP-68 | : CPFGEVFNATRFASV   |
| 295 : SGP-5       | : RTQLPPAYTNSFTR  | 327 : SGP-37 | : GKQGNFKNLRVFK   | 359 : SGP-69 | : VFNATRFASVYAWNR   |
| 296 : SGP-6       | : PAYTNSFTRGVYYP  | 328 : SGP-38 | : FKNLREFVFNKIDG  | 360 : SGP-70 | : RFASVYAWNRKRISN   |
| 297 : SGP-7       | : SFTRGVYYPDKVFR  | 329 : SGP-39 | : EFVFNKIDGYFKIY  | 361 : SGP-71 | : YAWNRKRISNCVADY   |
| 298 : SGP-8       | : VYYPDKVFRSSVLH  | 330 : SGP-40 | : NIDGYFKIYSKHTP  | 362 : SGP-72 | : KRISNCVADYSVLYN   |
| 299 : SGP-9       | : KVFRSSVLHSTQDL  | 331 : SGP-41 | : FKIYSKHTPINLVRI | 363 : SGP-73 | : CVADYSVLVNSASF    |
| 300 : SGP-10      | : SVLHSTQDLFLPFF  | 332 : SGP-42 | : KHTPINLVRLDLPQ  | 364 : SGP-74 | : SVLVNSASFSTFKCY   |
| 301 : SGP-11      | : TQDLFLPFFSNVTW  | 333 : SGP-43 | : NLVRDLPQGFSALE  | 365 : SGP-75 | : SASFSTFKCYGVSPT   |
| 302 : SGP-12      | : LPFFSNVTWFHAIH  | 334 : SGP-44 | : LPQGFSALEPLVDL  | 366 : SGP-76 | : TFKCYGVSPTKLNLD   |
| 303 : SGP-13      | : NVTWFHAIHVSGTN  | 335 : SGP-45 | : SALEPLVDLPIGIN  | 367 : SGP-77 | : GVSPTKLNLDLFCFTNV |
| 304 : SGP-14      | : HAIHVSGTNGTKRFD | 336 : SGP-46 | : LVDLPIGINITRFQT | 368 : SGP-78 | : KLNDLFCFTNVYADSF  |
| 305 : SGP-15      | : SGTNGTKRFDNPVLE | 337 : SGP-47 | : IGINITRFQTLALH  | 369 : SGP-79 | : CFTNVYADSFVIRGD   |
| 306 : SGP-16      | : TKRFDNPVLPFNDG  | 338 : SGP-48 | : TRFQTLALHRSYLT  | 370 : SGP-80 | : YADSFVIRGQIAPGQT  |
| 307 : SGP-17      | : NPVLPFNDGVYFAS  | 339 : SGP-49 | : LLALHRSYLTPGDSS | 371 : SGP-81 | : VIRGDEVQIAPGQT    |
| 308 : SGP-18      | : FNDGVYFASTEKSNI | 340 : SGP-50 | : RSYLTPGDSSSGWT  | 372 : SGP-82 | : EVRQIAPGQTGKIAD   |
| 309 : SGP-19      | : YFASTEKSNIIRGWI | 341 : SGP-51 | : PGDSSSGWTAGAAA  | 373 : SGP-83 | : APGQTGKIADYNYKL   |
| 310 : SGP-20      | : EKSNIIRGWIFGTTI | 342 : SGP-52 | : SGWTAGAAAYVGYI  | 374 : SGP-84 | : GKIADYNYKLPPDDFT  |
| 311 : SGP-21      | : IRGWIFGTTLDLSD  | 343 : SGP-53 | : GAAAYVGYLQPRTE  | 375 : SGP-85 | : YNYKLPPDDFTGCVIA  |
| 312 : SGP-22      | : FGTTLDLSDQLLIV  | 344 : SGP-54 | : YVGYLQPRTEFLLY  | 376 : SGP-86 | : PDDFTGCVIAWNSNN   |
| 313 : SGP-23      | : DSKTQLLIVNATN   | 345 : SGP-55 | : QPRTFLLYNENGTI  |              |                     |
| 314 : SGP-24      | : SLLIVNATNVVIVK  | 346 : SGP-56 | : LLKYNENGTITDAVD |              |                     |



RACK LAYOUT FOR SYNTHESIS :

**31753 : Rack E**

DESCRIPTION : 564 peptides based on sequences provided.

COMMENTS: Peptides despatched dried down.  
All controls have been removed for QC testing.

| A1  | A2  | A3  | A4  | A5  | A6  | A7  | A8  | A9  | A10 | A11 | A12 |
|-----|-----|-----|-----|-----|-----|-----|-----|-----|-----|-----|-----|
| 377 | 385 | 393 | 401 | 409 | 417 | 425 | 433 | 441 | 449 | 457 | 465 |
| B1  | B2  | B3  | B4  | B5  | B6  | B7  | B8  | B9  | B10 | B11 | B12 |
| 378 | 386 | 394 | 402 | 410 | 418 | 426 | 434 | 442 | 450 | 458 | 466 |
| C1  | C2  | C3  | C4  | C5  | C6  | C7  | C8  | C9  | C10 | C11 | C12 |
| 379 | 387 | 395 | 403 | 411 | 419 | 427 | 435 | 443 | 451 | 459 | 467 |
| D1  | D2  | D3  | D4  | D5  | D6  | D7  | D8  | D9  | D10 | D11 | D12 |
| 380 | 388 | 396 | 404 | 412 | 420 | 428 | 436 | 444 | 452 | 460 | 468 |
| E1  | E2  | E3  | E4  | E5  | E6  | E7  | E8  | E9  | E10 | E11 | E12 |
| 381 | 389 | 397 | 405 | 413 | 421 | 429 | 437 | 445 | 453 | 461 | 469 |
| F1  | F2  | F3  | F4  | F5  | F6  | F7  | F8  | F9  | F10 | F11 | F12 |
| 382 | 390 | 398 | 406 | 414 | 422 | 430 | 438 | 446 | 454 | 462 | 470 |
| G1  | G2  | G3  | G4  | G5  | G6  | G7  | G8  | G9  | G10 | G11 | G12 |
| 383 | 391 | 399 | 407 | 415 | 423 | 431 | 439 | 447 | 455 | 463 |     |
| H1  | H2  | H3  | H4  | H5  | H6  | H7  | H8  | H9  | H10 | H11 | H12 |
| 384 | 392 | 400 | 408 | 416 | 424 | 432 | 440 | 448 | 456 | 464 |     |

|               |                   |               |                   |               |                   |
|---------------|-------------------|---------------|-------------------|---------------|-------------------|
| 377 : SGP-87  | : GCVIAWNSNNLDSKV | 409 : SGP-119 | : SFGGVSVITPGTNTS | 441 : SGP-151 | : NLLLQYGSFCTQLNR |
| 378 : SGP-88  | : WNSNNLDSKVGNYN  | 410 : SGP-120 | : SVITPGTNTSNQVAV | 442 : SGP-152 | : YGSFCTQLNRALTGI |
| 379 : SGP-89  | : LDSKVGNYLYRIRI  | 411 : SGP-121 | : GTNTSNQVAVLYQDV | 443 : SGP-153 | : TQLNRALTGIAVEQD |
| 380 : SGP-90  | : GGNYNLYRFRKSN   | 412 : SGP-122 | : NQVAVLYQDVNCTEV | 444 : SGP-154 | : ALTGIAVEQDKNTQE |
| 381 : SGP-91  | : YLYRFRKSNLKPFE  | 413 : SGP-123 | : LYQDVNCTEVPVAIH | 445 : SGP-155 | : AVEQDKNTQEVFAQV |
| 382 : SGP-92  | : FRKSNLKPFERDIST | 414 : SGP-124 | : NCTEVPVAIHADQLT | 446 : SGP-156 | : KNTQEVFAQVKQIYK |
| 383 : SGP-93  | : LKPFERDISTEIYQA | 415 : SGP-125 | : PVAIHADQLTPTWRV | 447 : SGP-157 | : VFAQVKQIYKTPPIK |
| 384 : SGP-94  | : RDISTEIYQAGSTPC | 416 : SGP-126 | : ADQLTPTWRVYSTGS | 448 : SGP-158 | : KQIYKTPPIKDFGGF |
| 385 : SGP-95  | : EIYQAGSTPCNGVVE | 417 : SGP-127 | : PTWRVYSTGSNVFQT | 449 : SGP-159 | : TPPIKDFGGFNFSQI |
| 386 : SGP-96  | : GSTPCNGVEGFNCYE | 418 : SGP-128 | : YSTGSNVFQTRAGCL | 450 : SGP-160 | : DFGGFNFSQILPDPS |
| 387 : SGP-97  | : NGVEGFNCYFPLQSY | 419 : SGP-129 | : NVFQTRAGCLIGAEH | 451 : SGP-161 | : NFSQILPDPSKPSKR |
| 388 : SGP-98  | : FNCYFPLQSYGFQPT | 420 : SGP-130 | : RAGCLIGAEHVNNSY | 452 : SGP-162 | : LPDPSKPSKRSFIED |
| 389 : SGP-99  | : PLQSYGFQPTNGVGV | 421 : SGP-131 | : IGAEHVNNSYECDIH | 453 : SGP-163 | : KPSKRSFIEDLLFNK |
| 390 : SGP-100 | : GFQPTNGVGYQPYRV | 422 : SGP-132 | : VNNSYECDIPIGAGI | 454 : SGP-164 | : SFIEDLLFNKVTLAD |
| 391 : SGP-101 | : NGVGYQPYRVVVLSE | 423 : SGP-133 | : ECDIPIGAGICASYQ | 455 : SGP-165 | : LLFNKVTLADAGFIK |
| 392 : SGP-102 | : QPYRVVLSFELLHAP | 424 : SGP-134 | : IGAGICASYQTQTN  | 456 : SGP-166 | : VTLADAGFIKQYDGC |
| 393 : SGP-103 | : VVLSFELLHAPATVC | 425 : SGP-135 | : CASYQTQTNPRRAR  | 457 : SGP-167 | : AGFIKQYGDCLGDIA |
| 394 : SGP-104 | : ELLHAPATVCGPKKS | 426 : SGP-136 | : TQTNPRRARSVASQ  | 458 : SGP-168 | : QYGDCLGDIAARDLI |
| 395 : SGP-105 | : PATVCGPKKSTNLV  | 427 : SGP-137 | : PRRARSVASQSIIAY | 459 : SGP-169 | : LGDIAARDLICAQKF |
| 396 : SGP-106 | : GPKKSTNLVKNKCVN | 428 : SGP-138 | : SVASQSIIAYTMSLG | 460 : SGP-170 | : ARDLICAQKFNGLTV |
| 397 : SGP-107 | : TNLVKNKCVNFNFNC | 429 : SGP-139 | : SIIAYTMSLGAENSV | 461 : SGP-171 | : CAQKFNGLTVLPPLL |
| 398 : SGP-108 | : NKNVNFNFNGLTGTG | 430 : SGP-140 | : TMSLGAENSVAYSNN | 462 : SGP-172 | : NGLTVLPPLLTDEMI |
| 399 : SGP-109 | : FNFNGLTGTGVLTE  | 431 : SGP-141 | : AENSVAYSNNSIAIP | 463 : SGP-173 | : LPPLLTDEMIAQYTS |
| 400 : SGP-110 | : LTGTGVLTESNKFFL | 432 : SGP-142 | : AYSNNSIAIPNFTL  | 464 : SGP-174 | : TDEMIAQYTSALLAG |
| 401 : SGP-111 | : VLTESNKFFLFPQQF | 433 : SGP-143 | : SIAIPNFTISVTTTE | 465 : SGP-175 | : AQYTSALLAGTITSG |
| 402 : SGP-112 | : NKKFLFPQQFGRDIA | 434 : SGP-144 | : TNFTISVTTTEILPV | 466 : SGP-176 | : ALLAGTITSGWTFGA |
| 403 : SGP-113 | : PFQQFGRDIADTTDM | 435 : SGP-145 | : SVTTEILPVSMTKTS | 467 : SGP-177 | : TITSGWTFGAGAALQ |
| 404 : SGP-114 | : GRDIADTTDAVRDPC | 436 : SGP-146 | : ILPVSMTKTSVDCTM | 468 : SGP-178 | : WTFGAGAALQIPFAM |
| 405 : SGP-115 | : DTTDAVRDPTLEIIL | 437 : SGP-147 | : MTKTSVDCTMYICGD | 469 : SGP-179 | : GAALQIPFAMQMAYR |
| 406 : SGP-116 | : VRDPTLEILDITPC  | 438 : SGP-148 | : VDCTMYICGDSTEC  | 470 : SGP-180 | : IPFAMQMAYRFNGIG |
| 407 : SGP-117 | : TLEILDITPCSFGGV | 439 : SGP-149 | : YICGDSTECNLLLQ  |               |                   |
| 408 : SGP-118 | : DITPCSFGGVSVITP | 440 : SGP-150 | : STECSNLLLQYGSFC |               |                   |

RACK LAYOUT FOR SYNTHESIS :

**31753 : Rack F**

DESCRIPTION : 564 peptides based on sequences provided.

COMMENTS: Peptides despatched dried down.  
All controls have been removed for QC testing.

|     |     |     |     |     |     |     |     |     |     |     |     |
|-----|-----|-----|-----|-----|-----|-----|-----|-----|-----|-----|-----|
| A1  | A2  | A3  | A4  | A5  | A6  | A7  | A8  | A9  | A10 | A11 | A12 |
| 471 | 479 | 487 | 495 | 503 | 511 | 519 | 527 | 535 | 543 | 551 | 559 |
| B1  | B2  | B3  | B4  | B5  | B6  | B7  | B8  | B9  | B10 | B11 | B12 |
| 472 | 480 | 488 | 496 | 504 | 512 | 520 | 528 | 536 | 544 | 552 | 560 |
| C1  | C2  | C3  | C4  | C5  | C6  | C7  | C8  | C9  | C10 | C11 | C12 |
| 473 | 481 | 489 | 497 | 505 | 513 | 521 | 529 | 537 | 545 | 553 | 561 |
| D1  | D2  | D3  | D4  | D5  | D6  | D7  | D8  | D9  | D10 | D11 | D12 |
| 474 | 482 | 490 | 498 | 506 | 514 | 522 | 530 | 538 | 546 | 554 | 562 |
| E1  | E2  | E3  | E4  | E5  | E6  | E7  | E8  | E9  | E10 | E11 | E12 |
| 475 | 483 | 491 | 499 | 507 | 515 | 523 | 531 | 539 | 547 | 555 | 563 |
| F1  | F2  | F3  | F4  | F5  | F6  | F7  | F8  | F9  | F10 | F11 | F12 |
| 476 | 484 | 492 | 500 | 508 | 516 | 524 | 532 | 540 | 548 | 556 | 564 |
| G1  | G2  | G3  | G4  | G5  | G6  | G7  | G8  | G9  | G10 | G11 | G12 |
| 477 | 485 | 493 | 501 | 509 | 517 | 525 | 533 | 541 | 549 | 557 |     |
| H1  | H2  | H3  | H4  | H5  | H6  | H7  | H8  | H9  | H10 | H11 | H12 |
| 478 | 486 | 494 | 502 | 510 | 518 | 526 | 534 | 542 | 550 | 558 |     |

|               |                    |               |                    |               |                    |
|---------------|--------------------|---------------|--------------------|---------------|--------------------|
| 471 : SGP-181 | : QMAYRFNGIGVTQNV  | 503 : SGP-213 | : VFLHVTVYVPAQEKNE | 535 : SGP-245 | : IAGLIAIVMVTIMLCL |
| 472 : SGP-182 | : FNGIGVTQNVLYENQ  | 504 : SGP-214 | : TYVPAQEKNFFTAPAE | 536 : SGP-246 | : AIVMVTIMLCCMTSC  |
| 473 : SGP-183 | : VTQNVLYENQKLIAN  | 505 : SGP-215 | : QEKNFTTAPAICHDCG | 537 : SGP-247 | : TIMLCCMTSCCSCCLK |
| 474 : SGP-184 | : LYENQKLIANQFNSA  | 506 : SGP-216 | : TTAPAICHDKGAHFPE | 538 : SGP-248 | : CMTSCCSCCLKGCCSC |
| 475 : SGP-185 | : KLIANQFNNSAIGKIQ | 507 : SGP-217 | : ICHDGAHFPPREGVFE | 539 : SGP-249 | : CSCCLKGCCSCGSCCK |
| 476 : SGP-186 | : QFNNSAIGKIQDSLSS | 508 : SGP-218 | : KAHFPREGVVFVSNGT | 540 : SGP-250 | : GCCSCGSCCKFDEDD  |
| 477 : SGP-187 | : IGKIQDSLSSSTASAI | 509 : SGP-219 | : REGVVFVSNNGTHWFV | 541 : SGP-251 | : GSCCKFDEDDSEPVL  |
| 478 : SGP-188 | : DLSLSSSTASALGKQL | 510 : SGP-220 | : VSNNGTHWFVTQRNFY | 542 : SGP-252 | : FDEDDSEPVLKGVKVL |
| 479 : SGP-189 | : TASALGKQLQDVVNQN | 511 : SGP-221 | : HWFVTQRNFYEPQI   | 543 : SGP-253 | : DDSEPVLKGVKLVHYT |
| 480 : SGP-190 | : GKLQDVVNQNAQALN  | 512 : SGP-222 | : QRNFYEPQIITTDNT  | 544 : ep-1    | : MYSFVSEETGTLIVN  |
| 481 : SGP-191 | : VVNQNAQALNTLVKQ  | 513 : SGP-223 | : EPQIITTDNTFVSGN  | 545 : ep-2    | : SEETGTLIVNSVLLF  |
| 482 : SGP-192 | : AQALNTLVKQLSSNF  | 514 : SGP-224 | : TTDNTFVSGNCDVVI  | 546 : ep-3    | : TLIVNSVLLFLAFV   |
| 483 : SGP-193 | : TLVKQLSSNFGAIS   | 515 : SGP-225 | : FVSGNCDVVIGIVNN  | 547 : ep-4    | : SVLLFLAFVVFLLVT  |
| 484 : SGP-194 | : LSSNFGAISSVLND   | 516 : SGP-226 | : CDVVIIGIVNNTVYD  | 548 : ep-5    | : LAFVVFLLVTLAILT  |
| 485 : SGP-195 | : GAISSVLNDILSRL   | 517 : SGP-227 | : GIVNNTVYDPLQPEI  | 549 : ep-6    | : FLLVTLAILTALRLC  |
| 486 : SGP-196 | : VLNDILSRLDKVEAE  | 518 : SGP-228 | : TVYDPLQPELDSFKE  | 550 : ep-7    | : LAILTALRLCAYCCN  |
| 487 : SGP-197 | : LSRDKVEAEVQIDRL  | 519 : SGP-229 | : LQPELDSFKEELDKY  | 551 : ep-8    | : ALRLCAYCCNIVNV   |
| 488 : SGP-198 | : KVEAEVQIDRLITGR  | 520 : SGP-230 | : DSFKEELDKYFKNHT  | 552 : ep-9    | : AYCCNIVNVSLVKPS  |
| 489 : SGP-199 | : VQIDRLITGRQLQSL  | 521 : SGP-231 | : ELDKYFKNHTSPDVI  | 553 : ep-10   | : IVNVSLVKPSFYVYS  |
| 490 : SGP-200 | : LITGRQLQSLQTYVT  | 522 : SGP-232 | : FKNHTSPDVDLGD    | 554 : ep-11   | : LVKPSFYVYSRVKNL  |
| 491 : SGP-201 | : LQSLQTYVTQQLIR   | 523 : SGP-233 | : SPDVDLGDISGINAS  | 555 : ep-12   | : FYVYSRVKLNLSRV   |
| 492 : SGP-202 | : TYVTQQLIRAAEIRA  | 524 : SGP-234 | : LGDISGINASVVNI   | 556 : ep-13   | : RVKLNLSRVPDLLV   |
| 493 : SGP-203 | : QLIRAAEIRASANLA  | 525 : SGP-235 | : GINASVVNIQKEIDR  | 557 : sp-1    | : MADSNGTITVEELKK  |
| 494 : SGP-204 | : AEIRASANLAATKM   | 526 : SGP-236 | : VVNIQKEIDRLENEV  | 558 : sp-2    | : GTITVEELKKLLEQW  |
| 495 : SGP-205 | : SANLAATKMSECVL   | 527 : SGP-237 | : KEIDRLNEVARNLNE  | 559 : sp-3    | : EELKKLLEQWNLVIG  |
| 496 : SGP-206 | : ATKMSECVLQSKRV   | 528 : SGP-238 | : LNEVAKNLNESLID   | 560 : sp-4    | : LLEQWNLVIGFLFLT  |
| 497 : SGP-207 | : ECVLQSKRVDFCGK   | 529 : SGP-239 | : KNLNESLIDLQELGK  | 561 : sp-5    | : NLVIGFLFLTWICLL  |
| 498 : SGP-208 | : QSKRVDFCGKGYHLM  | 530 : SGP-240 | : SLIDLQELGKYEQY   | 562 : sp-6    | : FLFLTWICLLQFAYA  |
| 499 : SGP-209 | : DFCGKGYHLMSPFPQ  | 531 : SGP-241 | : QELGKYEQYIKWPWY  | 563 : sp-7    | : WICLLQFAYANRNF   |
| 500 : SGP-210 | : GYHLMSPFQSPHGV   | 532 : SGP-242 | : YEQYIKWPWYIWLGF  | 564 : sp-8    | : QFAYANRNFYIYIK   |
| 501 : SGP-211 | : SFPQSPHGVVFLHV   | 533 : SGP-243 | : KWPWYIWLGFIAGLI  |               |                    |
| 502 : SGP-212 | : APHGVVFLHVTVYVP  | 534 : SGP-244 | : IWLGFIAGLIAIVMV  |               |                    |

RACK LAYOUT FOR SYNTHESIS :

**31754 : Rack A**

DESCRIPTION : 117 peptides based on sequences provided.

COMMENTS: Peptides despatched dried down.  
All controls have been removed for QC testing.

| A1 | A2 | A3 | A4 | A5 | A6 | A7 | A8 | A9 | A10 | A11 | A12 |
|----|----|----|----|----|----|----|----|----|-----|-----|-----|
| 1  | 9  | 17 | 25 | 33 | 41 | 49 | 57 | 65 | 73  | 81  | 89  |
| B1 | B2 | B3 | B4 | B5 | B6 | B7 | B8 | B9 | B10 | B11 | B12 |
| 2  | 10 | 18 | 26 | 34 | 42 | 50 | 58 | 66 | 74  | 82  | 90  |
| C1 | C2 | C3 | C4 | C5 | C6 | C7 | C8 | C9 | C10 | C11 | C12 |
| 3  | 11 | 19 | 27 | 35 | 43 | 51 | 59 | 67 | 75  | 83  | 91  |
| D1 | D2 | D3 | D4 | D5 | D6 | D7 | D8 | D9 | D10 | D11 | D12 |
| 4  | 12 | 20 | 28 | 36 | 44 | 52 | 60 | 68 | 76  | 84  | 92  |
| E1 | E2 | E3 | E4 | E5 | E6 | E7 | E8 | E9 | E10 | E11 | E12 |
| 5  | 13 | 21 | 29 | 37 | 45 | 53 | 61 | 69 | 77  | 85  | 93  |
| F1 | F2 | F3 | F4 | F5 | F6 | F7 | F8 | F9 | F10 | F11 | F12 |
| 6  | 14 | 22 | 30 | 38 | 46 | 54 | 62 | 70 | 78  | 86  | 94  |
| G1 | G2 | G3 | G4 | G5 | G6 | G7 | G8 | G9 | G10 | G11 | G12 |
| 7  | 15 | 23 | 31 | 39 | 47 | 55 | 63 | 71 | 79  | 87  |     |
| H1 | H2 | H3 | H4 | H5 | H6 | H7 | H8 | H9 | H10 | H11 | H12 |
| 8  | 16 | 24 | 32 | 40 | 48 | 56 | 64 | 72 | 80  | 88  |     |

- |                               |                                |                                        |
|-------------------------------|--------------------------------|----------------------------------------|
| 1 : sp-9 : NNRNFLYIIKLI FLW   | 33 : sp-41 : IGNYKLNTDHSSSSD   | 65 : np-30 : IGTRNPANNAI VLQ           |
| 2 : sp-10 : LYIIKLI FLWLLWPV  | 34 : sp-42 : LNTDHSSSSDNIALL   | 66 : np-31 : PANNAI VLQLPQGT           |
| 3 : sp-11 : LIFLWLLWPVTLACF   | 35 : sp-43 : TDHSSSSDNIALLVQ   | 67 : np-32 : AIVLQLPQGTTL PKG          |
| 4 : sp-12 : LLWPVTLACFVLA AV  | 36 : np-1 : MSDNGPQNQRNAPRI    | 68 : np-33 : LPQGTTL PKGFYAEG          |
| 5 : sp-13 : TLACFVLA AVYRINW  | 37 : np-2 : PQNQRNAPRITFGGP    | 69 : np-34 : TLPKGFYAEGSRGGS           |
| 6 : sp-14 : VLA AVYRINWITGGI  | 38 : np-3 : NAPRITFGG PSDSTG   | 70 : np-35 : FYAEGSRGGSQASSR           |
| 7 : sp-15 : YRINWITGGIAIAMA   | 39 : np-4 : TFGG PSDSTG SNQNG  | 71 : np-36 : SRGGSQASSR SSSRS          |
| 8 : sp-16 : ITGGIAIAMA CLVGL  | 40 : np-5 : SDSTG SNQNGERSGA   | 72 : np-37 : QASSR SSSRSRNSSR          |
| 9 : sp-17 : AIAMACL VGLMWLSY  | 41 : np-6 : SNQNGERSGARSQR     | 73 : np-38 : SSSRSRNSRNSTPG            |
| 10 : sp-18 : CLVGLMWLSYFIASF  | 42 : np-7 : ERSGARSQR RPQGL    | 74 : np-39 : RNSSRNSTPGSSRGT           |
| 11 : sp-19 : MWLSYFIASFRLFAR  | 43 : np-8 : RSKQR RPQGLPNNTA   | 75 : np-40 : NSTPGSSRGTSPARM           |
| 12 : sp-20 : FIASFRLFARTRSMW  | 44 : np-9 : RPQGLPNNTASWFTA    | 76 : np-41 : SSRGTSPARMAGNGG           |
| 13 : sp-21 : RLFARTRSMWSFNPE  | 45 : np-10 : PNTASWFTALTQHG    | 77 : np-42 : SPARMAGNGGDAALA           |
| 14 : sp-22 : TRSMWSFNPETNILL  | 46 : np-11 : SWFTALTQHGKEDLK   | 78 : np-43 : AGNGGDAALALLLLD           |
| 15 : sp-23 : SFNPETNILLNVP LH | 47 : np-12 : LTQHGKEDLK FPRGQ  | 79 : np-44 : DAALALLLLDRLNQL           |
| 16 : sp-24 : TNILLNVP LHGTILT | 48 : np-13 : KEDLK FPRGQGV PIN | 80 : np-45 : LLLLDRLNQL ES KM S        |
| 17 : sp-25 : NVPLHGTILTRP LLE | 49 : np-14 : FPRGQGV PINTNSSP  | 81 : np-46 : RLNQL ES KM S G K G Q Q   |
| 18 : sp-26 : GTILTRP LLESELVI | 50 : np-15 : GVPINTNSSPDDQIG   | 82 : np-47 : ES KM S G K G Q Q Q Q Q T |
| 19 : sp-27 : RPLLESELVIGAVIL  | 51 : np-16 : TNSSPDDQIGY YRRA  | 83 : np-48 : GKGQQQQQGT VTKKS          |
| 20 : sp-28 : SELVIGAVILRGHLR  | 52 : np-17 : DDQIGY YRRATRRIR  | 84 : np-49 : QQQQGT VTKKSAAEAS         |
| 21 : sp-29 : GAVILRGHLRIAGHH  | 53 : np-18 : YYRATRRIRGGDGK    | 85 : np-50 : VTKKSAAEASKKPRQ           |
| 22 : sp-30 : RGHLRIAGHHLRGCD  | 54 : np-19 : TRRIRGGDGKMKDLS   | 86 : np-51 : AA EASKKPRQKRTAT          |
| 23 : sp-31 : IAGHHLRGCDIKDLP  | 55 : np-20 : GGDGKMKDLSPRWYF   | 87 : np-52 : KKRQKRTATKAYNV            |
| 24 : sp-32 : LGRCDIKDLPKEITV  | 56 : np-21 : MKDLSPRWYFY YLGT  | 88 : np-53 : KRTATKAYNV TQAFG          |
| 25 : sp-33 : IKDLPKEITVATSRT  | 57 : np-22 : PRWYFY YLGTGPEAG  | 89 : np-54 : KAYNV TQAFGRGPE           |
| 26 : sp-34 : KEITVATSRTLSYYK  | 58 : np-23 : YYLGTGPEAGLPYGA   | 90 : np-55 : TQAFGRGPEQTQGN            |
| 27 : sp-35 : ATSRTLSYYKLGASQ  | 59 : np-24 : GPEAGLPY GANKDGI  | 91 : np-56 : RRGPEQTQGNFGDQE           |
| 28 : sp-36 : LSYYKLGASQRVAGD  | 60 : np-25 : LPY GANKDGI IWVAT | 92 : np-57 : QTQGNFGDQELIRQG           |
| 29 : sp-37 : LGASQRVAGDSGFAA  | 61 : np-26 : NKDGI IWVATEGALN  | 93 : np-58 : FGDQELIRQGT DYKH          |
| 30 : sp-38 : RVAGDSGFAAYSRYR  | 62 : np-27 : IWVATEGALNTPKDH   | 94 : np-59 : LIRQGT DYKHW P Q I A      |
| 31 : sp-39 : SGFAAYSRYRIGNYK  | 63 : np-28 : EGALNTPKDH I GTRN |                                        |
| 32 : sp-40 : YSRYRIGNYK LNTDH | 64 : np-29 : TPKDH I GTRNPANNA |                                        |

RACK LAYOUT FOR SYNTHESIS :

**31754 : Rack B**

DESCRIPTION : 117 peptides based on sequences provided.

COMMENTS: Peptides despatched dried down.  
All controls have been removed for QC testing.

| A1  | A2  | A3  | A4 | A5 | A6 | A7 | A8 | A9 | A10 | A11 | A12 |
|-----|-----|-----|----|----|----|----|----|----|-----|-----|-----|
| 95  | 103 | 111 |    |    |    |    |    |    |     |     |     |
| B1  | B2  | B3  | B4 | B5 | B6 | B7 | B8 | B9 | B10 | B11 | B12 |
| 96  | 104 | 112 |    |    |    |    |    |    |     |     |     |
| C1  | C2  | C3  | C4 | C5 | C6 | C7 | C8 | C9 | C10 | C11 | C12 |
| 97  | 105 | 113 |    |    |    |    |    |    |     |     |     |
| D1  | D2  | D3  | D4 | D5 | D6 | D7 | D8 | D9 | D10 | D11 | D12 |
| 98  | 106 | 114 |    |    |    |    |    |    |     |     |     |
| E1  | E2  | E3  | E4 | E5 | E6 | E7 | E8 | E9 | E10 | E11 | E12 |
| 99  | 107 | 115 |    |    |    |    |    |    |     |     |     |
| F1  | F2  | F3  | F4 | F5 | F6 | F7 | F8 | F9 | F10 | F11 | F12 |
| 100 | 108 | 116 |    |    |    |    |    |    |     |     |     |
| G1  | G2  | G3  | G4 | G5 | G6 | G7 | G8 | G9 | G10 | G11 | G12 |
| 101 | 109 | 117 |    |    |    |    |    |    |     |     |     |
| H1  | H2  | H3  | H4 | H5 | H6 | H7 | H8 | H9 | H10 | H11 | H12 |
| 102 | 110 |     |    |    |    |    |    |    |     |     |     |

- 95 : np-60 : TDYKHWPQIAQFAPS
- 96 : np-61 : WPQIAQFAPSASAFF
- 97 : np-62 : QFAPSASAFFGMSRI
- 98 : np-63 : ASAFFGMSRIGMEVT
- 99 : np-64 : GMSRIGMEVTPSGTW
- 100 : np-65 : GMEVTPSGTWLTYTG
- 101 : np-66 : PSGTWLTYTGAIKLD
- 102 : np-67 : LTYTGAIKLDDKDPN
- 103 : np-68 : AIKLDDKDPNFKDQV
- 104 : np-69 : DKDPNFKDQVILLNK
- 105 : np-70 : FKDQVILLNKHIDAY
- 106 : np-71 : ILLNKHIDAYKTFPP
- 107 : np-72 : HIDAYKTFPPTEPKK
- 108 : np-73 : KTFPPTEPKKDKKKK
- 109 : np-74 : TEPKKDKKKKADETQ
- 110 : np-75 : DKKKKADETQALPQR
- 111 : np-76 : ADETQALPQRQKKQQ
- 112 : np-77 : ALPQRQKKQQTVTLL
- 113 : np-78 : QKKQQTVTLLPAADL
- 114 : np-79 : TVTLLPAADLDDFSK
- 115 : np-80 : PAADLDDFSKQLQQS
- 116 : np-81 : DDFSKQLQQSMSSAD
- 117 : np-82 : KQLQQSMSSADSTQA
